# Supplementary material for: Prematurity and respiratory outcomes program (PROP): study protocol of a prospective multicenter study of respiratory outcomes of preterm infants in the United States
Source: PubMed Central journal article supplement (PMC4407843; doi:10.1186/s12887-015-0346-3), 2015-04-10
Supplement: 12887_2015_346_MOESM3_ESM.pdf [file 12887_2015_346_MOESM3_ESM.pdf]

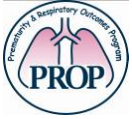

PREMATURITY AND RESPIRATORY OUTCOMES PROGRAM

PID: \_\_\_\_\_

DAILY GROWTH AND NUTRITION / DAILY MEDICATION DATA

DATE: \_\_\_ / \_\_\_ / \_\_\_\_\_

WEEK \_\_\_ / DAY \_\_\_

Daily Growth and Nutrition Data

For question 1 and 2: If more than one measurement is taken on the same day, enter the first value obtained.

- 1. What was the baby's body weight?      \_\_\_ \_\_\_ \_\_\_ gms      <sub>99</sub> Not done
- 2. What was the baby's head circumference?      \_\_\_ . \_\_\_ cm      <sub>99</sub> Not done
- 3. How much milk did the baby receive today?      <sub>0</sub> None  
<sub>1</sub> Partial Feed  
<sub>2</sub> Full Feed (no parenteral nutrition on this day)
- 3a. If **Partial** or **Full** milk feed, indicate the type of milk provided:      <sub>1</sub> Human milk  
<sub>2</sub> Formula  
<sub>3</sub> Both

Daily Medication Data

- 4. Were any drugs given today?      <sub>0</sub> No      <sub>1</sub> Yes

If **Yes**, indicate which of the following drugs were given today:

- 5. Methylxanthine drugs:      <sub>0</sub> No      <sub>1</sub> Yes

5a. If **Yes**, choose one:

- <sub>1</sub> Caffeine Citrate\*      Dose: \_\_\_\_\_ mg      Given every \_\_\_ hour(s)      Route: <sub>1</sub> PO (oral)  
<sub>2</sub> IV (intravenous)
- <sub>2</sub> Aminophylline      Dose: \_\_\_\_\_ mg      Given every \_\_\_ hour(s)
- <sub>3</sub> Theophylline      Dose: \_\_\_\_\_ mg      Given every \_\_\_ hour(s)
- <sub>98</sub> Other (record on the Additional Medication Log)

\* If your site calculates the dose of Anhydrous Caffeine Base rather than Caffeine Citrate, multiply the Caffeine Base dose by 2.

- 6. Systemic Corticosteroid drugs:      <sub>0</sub> No      <sub>1</sub> Yes

6a. If **Yes**, check all that apply:

- Hydrocortisone      Dose: \_\_\_\_\_ mg      Given every \_\_\_ hour(s)      Route: <sub>1</sub> PO (oral)  
<sub>2</sub> IV (intravenous)
- Dexamethasone      Dose: \_\_\_\_\_ mg      Given every \_\_\_ hour(s)      Route: <sub>1</sub> PO (oral)  
<sub>2</sub> IV (intravenous)
- Prednisone / Prednisolone      Dose: \_\_\_\_\_ mg      Given every \_\_\_ hour(s)
- Methylprednisolone      Dose: \_\_\_\_\_ mg      Given every \_\_\_ hour(s)
- Other (record on the Additional Medication Log)

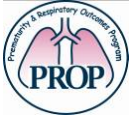

**PREMATURITY AND RESPIRATORY OUTCOMES PROGRAM**

PID: \_\_\_\_\_

**DAILY GROWTH AND NUTRITION / DAILY MEDICATION DATA**

DATE: \_\_\_ / \_\_\_ / \_\_\_\_\_

WEEK \_\_\_ / DAY \_\_\_

**NOTE:** If utilizing a combination therapy drug, record the individual components in their respective drug categories. For example Symbicort (budesonide and formoterol) would be recorded as budesonide – Inhaled Steroid and formoterol – Inhaled Bronchodilator.

7. Inhaled Steroid drugs: <sub>0</sub> No <sub>1</sub> Yes

7a. If **Yes**, check all that apply:

- |                                                                          |                                                                      |                         |
|--------------------------------------------------------------------------|----------------------------------------------------------------------|-------------------------|
| <input type="checkbox"/> Budesonide (Nebulized or MDI)                   | Dose: _____ <input type="checkbox"/> mcg <input type="checkbox"/> mg | Given every ___ hour(s) |
| <input type="checkbox"/> Beclomethasone (MDI)                            | Dose: _____ mcg                                                      | Given every ___ hour(s) |
| <input type="checkbox"/> Ciclesonide (MDI)                               | Dose: _____ mcg                                                      | Given every ___ hour(s) |
| <input type="checkbox"/> Flunisolide (MDI)                               | Dose: _____ mcg                                                      | Given every ___ hour(s) |
| <input type="checkbox"/> Fluticasone (MDI)                               | Dose: _____ mcg                                                      | Given every ___ hour(s) |
| <input type="checkbox"/> Mometasone (MDI)                                | Dose: _____ mcg                                                      | Given every ___ hour(s) |
| <input type="checkbox"/> Triamcinolone (MDI)                             | Dose: _____ mcg                                                      | Given every ___ hour(s) |
| <input type="checkbox"/> Dexamethasone (Nebulized)                       | Dose: _____ mg                                                       | Given every ___ hour(s) |
| <input type="checkbox"/> Other (record on the Additional Medication Log) |                                                                      |                         |

If route of administration is Metered Dose Inhalator (MDI), calculate dose by multiplying the number of puffs by strength per puff.

8. Inhaled Bronchodilator drugs: <sub>0</sub> No <sub>1</sub> Yes

8a. If **Yes**, check all that apply:

- |                                                                          |                                                                      |                         |
|--------------------------------------------------------------------------|----------------------------------------------------------------------|-------------------------|
| <input type="checkbox"/> Albuterol (Nebulized or MDI)                    | Dose: _____ <input type="checkbox"/> mcg <input type="checkbox"/> mg | Given every ___ hour(s) |
| <input type="checkbox"/> Levalbuterol (Nebulized or MDI)                 | Dose: _____ <input type="checkbox"/> mcg <input type="checkbox"/> mg | Given every ___ hour(s) |
| <input type="checkbox"/> Ipratropium bromide<br>(Nebulized or MDI)       | Dose: _____ <input type="checkbox"/> mcg <input type="checkbox"/> mg | Given every ___ hour(s) |
| <input type="checkbox"/> Formoterol                                      | Dose: _____ mcg                                                      | Given every ___ hour(s) |
| <input type="checkbox"/> Racemic epinephrine (Nebulized)                 | Dose: _____ mg                                                       | Given every ___ hour(s) |
| <input type="checkbox"/> Other (record on the Additional Medication Log) |                                                                      |                         |



**PREMATURITY AND RESPIRATORY OUTCOMES PROGRAM**

PID: \_\_\_\_\_

**DAILY GROWTH AND NUTRITION / DAILY MEDICATION DATA**

DATE: \_\_\_ / \_\_\_ / \_\_\_\_\_

WEEK \_\_\_ / DAY \_\_\_

**NOTE:** If utilizing a combination therapy drug, record the individual components in their respective drug categories. For example Aldactazide (Spironolactone and Hydrochlorothiazide) would be recorded as Spironolactone and Hydrochlorothiazide.

9. Diuretic drugs: <sub>0</sub> No <sub>1</sub> Yes

9a. If **Yes**, check all that apply:

- Furosemide Dose: \_\_\_\_\_ mg Given every \_\_\_ hour(s) Route: <sub>1</sub> PO (oral)  
<sub>2</sub> IV (intravenous)
- Bumetanide Dose: \_\_\_\_\_ mg Given every \_\_\_ hour(s) Route: <sub>1</sub> PO (oral)  
<sub>2</sub> IV (intravenous)
- Chlorothiazide Dose: \_\_\_\_\_ mg Given every \_\_\_ hour(s) Route: <sub>1</sub> PO (oral)  
<sub>2</sub> IV (intravenous)
- Hydrochlorothiazide Dose: \_\_\_\_\_ mg Given every \_\_\_ hour(s)
- Spironolactone Dose: \_\_\_\_\_ mg Given every \_\_\_ hour(s)
- Metolazone Dose: \_\_\_\_\_ mg Given every \_\_\_ hour(s)
- Other (record on the Additional Medication Log)

10. Cardiovascular drugs: <sub>0</sub> No <sub>1</sub> Yes

10a. If **Yes**, check all that apply:

- Epinephrine Infusion  Vasopressin
- Dopamine Infusion  Norepinephrine
- Dobutamine Infusion

11. Other Cardio/Respiratory drugs: <sub>0</sub> No <sub>1</sub> Yes

11a. If **Yes**, check all that apply:

- Vitamin A IM or Oral  Other pulmonary vasodilators for treatment  
(for prevention of BPD) of pulmonary hypertension other than Nitric Oxide
- Surfactant  Mucolytic
- Sildenafil  Dornase alfa
- Milrinone

12. Neuro-Muscular Blocking Agent: <sub>0</sub> No <sub>1</sub> Yes

13. Antimicrobial drugs and other agents to prevent infections: <sub>0</sub> No <sub>1</sub> Yes

13a. If **Yes**, check all that apply:

- Antibacterial
- Antifungal



**PREMATURITY AND RESPIRATORY OUTCOMES PROGRAM**

PID: \_\_\_\_\_

**DAILY GROWTH AND NUTRITION / DAILY MEDICATION DATA**

DATE: \_\_\_ / \_\_\_ / \_\_\_\_\_

WEEK \_\_\_ / DAY \_\_\_

- Antiviral
- Palivizumab
- Probiotic

14. Anxiolytic, Anticonvulsant, and Narcotic Analgesic drugs: <sub>0</sub> No <sub>1</sub> Yes

14a. If **Yes**, check all that apply:

- Benzodiazepines
- Phenobarbital
- Phenytoin
- Levetiracetam
- Morphine
- Fentanyl
- Methadone
- Dexmedetomidine

15. Anti-Gastroesophageal Reflux drugs: <sub>0</sub> No <sub>1</sub> Yes

15a. If **Yes**, check all that apply:

- Proton Pump Inhibitors
- H<sub>2</sub> Receptor Antagonists
- Motility agents
- Other

16. Use of blood products and Hematologic Supplements: <sub>0</sub> No <sub>1</sub> Yes

16a. If **Yes**, check all that apply:

- Erythropoietin
- Red Blood Cell Transfusion
- Platelets
- Iron Supplements

17. Oral Vitamins and Electrolyte Supplements: <sub>0</sub> No <sub>1</sub> Yes

17a. If **Yes**, check all that apply:

- Vitamin D
- Vitamin E
- Multivitamin
- Potassium Supplement
- Sodium Supplement

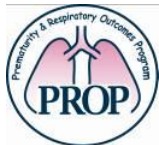

# PREMATURITY AND RESPIRATORY OUTCOMES PROGRAM

PID: \_\_\_\_\_

## DAILY RESPIRATORY DATA

DATE: \_\_\_ / \_\_\_ / \_\_\_\_\_

WEEK \_\_\_ / DAY \_\_\_

1. Did the baby receive any supplemental oxygen today? <sub>0</sub> No <sub>1</sub> Yes

1a. If **Yes**, how long was supplemental oxygen used for? <sub>1</sub> 12 hours or less  
<sub>2</sub> More than 12 hours

1b. What was the concentration of supplemental oxygen at 1200 (Noon) today? \_\_\_\_\_ %

2. Did the baby receive any other respiratory support today? <sub>0</sub> No <sub>1</sub> Yes

If Questions 1 or 2 are **Yes**, answer questions 3 – 6.

3. Was Positive Airway Pressure with Endotracheal Tube used today? <sub>0</sub> No <sub>1</sub> Yes

3a. If **Yes**, select ventilation mode and record the associated values at 1200 (Noon) or closest recorded data to 12 (Noon) if noon data are not available.

Conventional Mechanical Ventilation (CMV):  
Mean Airway Pressure (MAP): \_\_\_\_\_ cmH<sub>2</sub>O  
Positive End Expiratory Pressure (PEEP): \_\_\_\_\_ cmH<sub>2</sub>O

High Frequency Oscillation:  
MAP: \_\_\_\_\_ cmH<sub>2</sub>O

High Frequency Jet Ventilation:  
MAP: \_\_\_\_\_ cmH<sub>2</sub>O

4. Was Respiratory support without Endotracheal Tube used today? <sub>0</sub> No <sub>1</sub> Yes

4a. If **Yes**, select ventilation mode and record the associated values at 1200 (Noon) or closest recorded data to 12 (Noon) if noon data are not available.

Nasal Intermittent Mandatory Ventilation (NIMV):  
MAP: \_\_\_\_\_ cmH<sub>2</sub>O  
PEEP: \_\_\_\_\_ cmH<sub>2</sub>O

Continuous Positive Airway Pressure (CPAP):  
CPAP: \_\_\_\_\_ cmH<sub>2</sub>O

Nasal Cannula with flow rate:  
Nasal Cannula Flow: \_\_\_\_\_ Lpm

5. Was inhaled nitric oxide given today? <sub>0</sub> No <sub>1</sub> Yes

5a. If **Yes**, record the concentration at 1200 (Noon) or closest recorded data to 12 (Noon) if noon data are not available. \_\_\_\_\_ ppm

6. Was the baby reintubated today? <sub>0</sub> No <sub>1</sub> Yes

6a. If **Yes**, indicate the primary reason why the baby was reintubated:

- <sub>1</sub> Increasing respiratory distress
- <sub>2</sub> Stridor
- <sub>3</sub> Apnea and Bradycardia
- <sub>4</sub> Suspected infection
- <sub>5</sub> For diagnostic or therapeutic procedures, including surgery
- <sub>6</sub> Unplanned extubation(s), indicate the number of occurrences this day: \_\_\_\_\_
- <sub>98</sub> Other, specify: \_\_\_\_\_





**PREMATURITY AND RESPIRATORY OUTCOMES PROGRAM**

PID: \_\_\_\_\_

**DAILY GROWTH AND NUTRITION / DAILY MEDICATION DATA**

DATE: \_\_\_ / \_\_\_ / \_\_\_\_\_

WEEK \_\_\_ / DAY \_\_\_

**NOTE:** If utilizing a combination therapy drug, record the individual components in their respective drug categories. For example Symbicort (budesonide and formoterol) would be recorded as budesonide – Inhaled Steroid and formoterol – Inhaled Bronchodilator.

7. Inhaled Steroid drugs: <sub>0</sub> No <sub>1</sub> Yes

7a. If **Yes**, check all that apply:

- |                                                                          |             |                              |                             |                           |
|--------------------------------------------------------------------------|-------------|------------------------------|-----------------------------|---------------------------|
| <input type="checkbox"/> Budesonide (Nebulized or MDI)                   | Dose: _____ | <input type="checkbox"/> mcg | <input type="checkbox"/> mg | Given every _____ hour(s) |
| <input type="checkbox"/> Beclomethasone (MDI)                            | Dose: _____ | mcg                          |                             | Given every _____ hour(s) |
| <input type="checkbox"/> Ciclesonide (MDI)                               | Dose: _____ | mcg                          |                             | Given every _____ hour(s) |
| <input type="checkbox"/> Flunisolide (MDI)                               | Dose: _____ | mcg                          |                             | Given every _____ hour(s) |
| <input type="checkbox"/> Fluticasone (MDI)                               | Dose: _____ | mcg                          |                             | Given every _____ hour(s) |
| <input type="checkbox"/> Mometasone (MDI)                                | Dose: _____ | mcg                          |                             | Given every _____ hour(s) |
| <input type="checkbox"/> Triamcinolone (MDI)                             | Dose: _____ | mcg                          |                             | Given every _____ hour(s) |
| <input type="checkbox"/> Dexamethasone (Nebulized)                       | Dose: _____ | mg                           |                             | Given every _____ hour(s) |
| <input type="checkbox"/> Other (record on the Additional Medication Log) |             |                              |                             |                           |

If route of administration is Metered Dose Inhalator (MDI), calculate dose by multiplying the number of puffs by strength per puff.

8. Inhaled Bronchodilator drugs: <sub>0</sub> No <sub>1</sub> Yes

8a. If **Yes**, check all that apply:

- |                                                                          |             |                              |                             |                           |
|--------------------------------------------------------------------------|-------------|------------------------------|-----------------------------|---------------------------|
| <input type="checkbox"/> Albuterol (Nebulized or MDI)                    | Dose: _____ | <input type="checkbox"/> mcg | <input type="checkbox"/> mg | Given every _____ hour(s) |
| <input type="checkbox"/> Levalbuterol (Nebulized or MDI)                 | Dose: _____ | <input type="checkbox"/> mcg | <input type="checkbox"/> mg | Given every _____ hour(s) |
| <input type="checkbox"/> Ipratropium bromide<br>(Nebulized or MDI)       | Dose: _____ | <input type="checkbox"/> mcg | <input type="checkbox"/> mg | Given every _____ hour(s) |
| <input type="checkbox"/> Formoterol                                      | Dose: _____ | mcg                          |                             | Given every _____ hour(s) |
| <input type="checkbox"/> Racemic epinephrine (Nebulized)                 | Dose: _____ | mg                           |                             | Given every _____ hour(s) |
| <input type="checkbox"/> Other (record on the Additional Medication Log) |             |                              |                             |                           |



**PREMATURITY AND RESPIRATORY OUTCOMES PROGRAM**

PID: \_\_\_\_\_

**DAILY GROWTH AND NUTRITION / DAILY MEDICATION DATA**

DATE: \_\_\_ / \_\_\_ / \_\_\_\_\_

WEEK \_\_\_ / DAY \_\_\_

**NOTE:** If utilizing a combination therapy drug, record the individual components in their respective drug categories. For example Aldactazide (Spironolactone and Hydrochlorothiazide) would be recorded as Spironolactone and Hydrochlorothiazide.

9. Diuretic drugs: <sub>0</sub> No <sub>1</sub> Yes

9a. If **Yes**, check all that apply:

- Furosemide Dose: \_\_\_\_\_ mg Given every \_\_\_ hour(s) Route: <sub>1</sub> PO (oral)  
<sub>2</sub> IV (intravenous)
- Bumetanide Dose: \_\_\_\_\_ mg Given every \_\_\_ hour(s) Route: <sub>1</sub> PO (oral)  
<sub>2</sub> IV (intravenous)
- Chlorothiazide Dose: \_\_\_\_\_ mg Given every \_\_\_ hour(s) Route: <sub>1</sub> PO (oral)  
<sub>2</sub> IV (intravenous)
- Hydrochlorothiazide Dose: \_\_\_\_\_ mg Given every \_\_\_ hour(s)
- Spironolactone Dose: \_\_\_\_\_ mg Given every \_\_\_ hour(s)
- Metolazone Dose: \_\_\_\_\_ mg Given every \_\_\_ hour(s)
- Other (record on the Additional Medication Log)

10. Cardiovascular drugs: <sub>0</sub> No <sub>1</sub> Yes

10a. If **Yes**, check all that apply:

- Epinephrine Infusion  Vasopressin
- Dopamine Infusion  Norepinephrine
- Dobutamine Infusion

11. Other Cardio/Respiratory drugs: <sub>0</sub> No <sub>1</sub> Yes

11a. If **Yes**, check all that apply:

- Vitamin A IM or Oral  Other pulmonary vasodilators for treatment  
(for prevention of BPD) of pulmonary hypertension other than Nitric Oxide
- Surfactant  Mucolytic
- Sildenafil  Dornase alfa
- Milrinone

12. Neuro-Muscular Blocking Agent: <sub>0</sub> No <sub>1</sub> Yes

13. Antimicrobial drugs and other agents to prevent infections: <sub>0</sub> No <sub>1</sub> Yes

13a. If **Yes**, check all that apply:

- Antibacterial
- Antifungal





**PREMATURITY AND RESPIRATORY OUTCOMES PROGRAM**

PID: \_\_\_\_\_

**DAILY GROWTH AND NUTRITION / DAILY MEDICATION DATA**

DATE: \_\_\_ / \_\_\_ / \_\_\_\_\_

WEEK \_\_\_ / DAY \_\_\_

- Antiviral
- Palivizumab
- Probiotic

14. Anxiolytic, Anticonvulsant, and Narcotic Analgesic drugs: <sub>0</sub> No <sub>1</sub> Yes

14a. If **Yes**, check all that apply:

- Benzodiazepines
- Phenobarbital
- Phenytoin
- Levetiracetam
- Morphine
- Fentanyl
- Methadone
- Dexmedetomidine

15. Anti-Gastroesophageal Reflux drugs: <sub>0</sub> No <sub>1</sub> Yes

15a. If **Yes**, check all that apply:

- Proton Pump Inhibitors
- H<sub>2</sub> Receptor Antagonists
- Motility agents
- Other

16. Use of blood products and Hematologic Supplements: <sub>0</sub> No <sub>1</sub> Yes

16a. If **Yes**, check all that apply:

- Erythropoietin
- Red Blood Cell Transfusion
- Platelets
- Iron Supplements

17. Oral Vitamins and Electrolyte Supplements: <sub>0</sub> No <sub>1</sub> Yes

17a. If **Yes**, check all that apply:

- Vitamin D
- Vitamin E
- Multivitamin
- Potassium Supplement
- Sodium Supplement



# PREMATURITY AND RESPIRATORY OUTCOMES PROGRAM

PID: \_\_\_\_\_

## DAILY RESPIRATORY DATA

DATE: \_\_\_ / \_\_\_ / \_\_\_\_\_

WEEK \_\_\_ / DAY \_\_\_

1. Did the baby receive any supplemental oxygen today? <sub>0</sub> No <sub>1</sub> Yes

1a. If **Yes**, how long was supplemental oxygen used for? <sub>1</sub> 12 hours or less  
<sub>2</sub> More than 12 hours

1b. What was the concentration of supplemental oxygen at 1200 (Noon) today? \_\_\_\_\_ %

2. Did the baby receive any other respiratory support today? <sub>0</sub> No <sub>1</sub> Yes

If Questions 1 or 2 are **Yes**, answer questions 3 – 6.

3. Was Positive Airway Pressure with Endotracheal Tube used today? <sub>0</sub> No <sub>1</sub> Yes

3a. If **Yes**, select ventilation mode and record the associated values at 1200 (Noon) or closest recorded data to 12 (Noon) if noon data are not available.

Conventional Mechanical Ventilation (CMV):  
Mean Airway Pressure (MAP): \_\_\_\_\_ cmH<sub>2</sub>O  
Positive End Expiratory Pressure (PEEP): \_\_\_\_\_ cmH<sub>2</sub>O

High Frequency Oscillation:  
MAP: \_\_\_\_\_ cmH<sub>2</sub>O

High Frequency Jet Ventilation:  
MAP: \_\_\_\_\_ cmH<sub>2</sub>O

4. Was Respiratory support without Endotracheal Tube used today? <sub>0</sub> No <sub>1</sub> Yes

4a. If **Yes**, select ventilation mode and record the associated values at 1200 (Noon) or closest recorded data to 12 (Noon) if noon data are not available.

Nasal Intermittent Mandatory Ventilation (NIMV):  
MAP: \_\_\_\_\_ cmH<sub>2</sub>O  
PEEP: \_\_\_\_\_ cmH<sub>2</sub>O

Continuous Positive Airway Pressure (CPAP):  
CPAP: \_\_\_\_\_ cmH<sub>2</sub>O

Nasal Cannula with flow rate:  
Nasal Cannula Flow: \_\_\_\_\_ Lpm

5. Was inhaled nitric oxide given today? <sub>0</sub> No <sub>1</sub> Yes

5a. If **Yes**, record the concentration at 1200 (Noon) or closest recorded data to 12 (Noon) if noon data are not available. \_\_\_\_\_ ppm

6. Was the baby reintubated today? <sub>0</sub> No <sub>1</sub> Yes

6a. If **Yes**, indicate the primary reason why the baby was reintubated:

- <sub>1</sub> Increasing respiratory distress
- <sub>2</sub> Stridor
- <sub>3</sub> Apnea and Bradycardia
- <sub>4</sub> Suspected infection
- <sub>5</sub> For diagnostic or therapeutic procedures, including surgery
- <sub>6</sub> Unplanned extubation(s), indicate the number of occurrences this day: \_\_\_\_\_
- <sub>98</sub> Other, specify: \_\_\_\_\_



PREMATURITY AND RESPIRATORY OUTCOMES PROGRAM

PID: \_\_\_\_\_

DAILY GROWTH AND NUTRITION / DAILY MEDICATION DATA

DATE: \_\_\_ / \_\_\_ / \_\_\_\_\_

WEEK \_\_\_ / DAY \_\_\_

Daily Growth and Nutrition Data

For question 1 and 2: If more than one measurement is taken on the same day, enter the first value obtained.

- 1. What was the baby's body weight?      \_\_\_ \_\_\_ \_\_\_ gms      <sub>99</sub> Not done
- 2. What was the baby's head circumference?      \_\_\_ . \_\_\_ cm      <sub>99</sub> Not done
- 3. How much milk did the baby receive today?      <sub>0</sub> None  
<sub>1</sub> Partial Feed  
<sub>2</sub> Full Feed (no parenteral nutrition on this day)
- 3a. If **Partial** or **Full** milk feed, indicate the type of milk provided:      <sub>1</sub> Human milk  
<sub>2</sub> Formula  
<sub>3</sub> Both

Daily Medication Data

- 4. Were any drugs given today?      <sub>0</sub> No      <sub>1</sub> Yes

If **Yes**, indicate which of the following drugs were given today:

- 5. Methylxanthine drugs:      <sub>0</sub> No      <sub>1</sub> Yes

5a. If **Yes**, choose one:

- <sub>1</sub> Caffeine Citrate\*      Dose: \_\_\_\_\_ mg      Given every \_\_\_ hour(s)      Route: <sub>1</sub> PO (oral)  
<sub>2</sub> IV (intravenous)
- <sub>2</sub> Aminophylline      Dose: \_\_\_\_\_ mg      Given every \_\_\_ hour(s)
- <sub>3</sub> Theophylline      Dose: \_\_\_\_\_ mg      Given every \_\_\_ hour(s)
- <sub>98</sub> Other (record on the Additional Medication Log)

\* If your site calculates the dose of Anhydrous Caffeine Base rather than Caffeine Citrate, multiply the Caffeine Base dose by 2.

- 6. Systemic Corticosteroid drugs:      <sub>0</sub> No      <sub>1</sub> Yes

6a. If **Yes**, check all that apply:

- Hydrocortisone      Dose: \_\_\_\_\_ mg      Given every \_\_\_ hour(s)      Route: <sub>1</sub> PO (oral)  
<sub>2</sub> IV (intravenous)
- Dexamethasone      Dose: \_\_\_\_\_ mg      Given every \_\_\_ hour(s)      Route: <sub>1</sub> PO (oral)  
<sub>2</sub> IV (intravenous)
- Prednisone / Prednisolone      Dose: \_\_\_\_\_ mg      Given every \_\_\_ hour(s)
- Methylprednisolone      Dose: \_\_\_\_\_ mg      Given every \_\_\_ hour(s)
- Other (record on the Additional Medication Log)



**PREMATURITY AND RESPIRATORY OUTCOMES PROGRAM**

PID: \_\_\_\_\_

**DAILY GROWTH AND NUTRITION / DAILY MEDICATION DATA**

DATE: \_\_\_ / \_\_\_ / \_\_\_\_\_

WEEK \_\_\_ / DAY \_\_\_

**NOTE:** If utilizing a combination therapy drug, record the individual components in their respective drug categories. For example Symbicort (budesonide and formoterol) would be recorded as budesonide – Inhaled Steroid and formoterol – Inhaled Bronchodilator.

7. Inhaled Steroid drugs: <sub>0</sub> No <sub>1</sub> Yes

7a. If **Yes**, check all that apply:

- |                                                                          |                                                                      |                         |
|--------------------------------------------------------------------------|----------------------------------------------------------------------|-------------------------|
| <input type="checkbox"/> Budesonide (Nebulized or MDI)                   | Dose: _____ <input type="checkbox"/> mcg <input type="checkbox"/> mg | Given every ___ hour(s) |
| <input type="checkbox"/> Beclomethasone (MDI)                            | Dose: _____ mcg                                                      | Given every ___ hour(s) |
| <input type="checkbox"/> Ciclesonide (MDI)                               | Dose: _____ mcg                                                      | Given every ___ hour(s) |
| <input type="checkbox"/> Flunisolide (MDI)                               | Dose: _____ mcg                                                      | Given every ___ hour(s) |
| <input type="checkbox"/> Fluticasone (MDI)                               | Dose: _____ mcg                                                      | Given every ___ hour(s) |
| <input type="checkbox"/> Mometasone (MDI)                                | Dose: _____ mcg                                                      | Given every ___ hour(s) |
| <input type="checkbox"/> Triamcinolone (MDI)                             | Dose: _____ mcg                                                      | Given every ___ hour(s) |
| <input type="checkbox"/> Dexamethasone (Nebulized)                       | Dose: _____ mg                                                       | Given every ___ hour(s) |
| <input type="checkbox"/> Other (record on the Additional Medication Log) |                                                                      |                         |

If route of administration is Metered Dose Inhalator (MDI), calculate dose by multiplying the number of puffs by strength per puff.

8. Inhaled Bronchodilator drugs: <sub>0</sub> No <sub>1</sub> Yes

8a. If **Yes**, check all that apply:

- |                                                                          |                                                                      |                         |
|--------------------------------------------------------------------------|----------------------------------------------------------------------|-------------------------|
| <input type="checkbox"/> Albuterol (Nebulized or MDI)                    | Dose: _____ <input type="checkbox"/> mcg <input type="checkbox"/> mg | Given every ___ hour(s) |
| <input type="checkbox"/> Levalbuterol (Nebulized or MDI)                 | Dose: _____ <input type="checkbox"/> mcg <input type="checkbox"/> mg | Given every ___ hour(s) |
| <input type="checkbox"/> Ipratropium bromide<br>(Nebulized or MDI)       | Dose: _____ <input type="checkbox"/> mcg <input type="checkbox"/> mg | Given every ___ hour(s) |
| <input type="checkbox"/> Formoterol                                      | Dose: _____ mcg                                                      | Given every ___ hour(s) |
| <input type="checkbox"/> Racemic epinephrine (Nebulized)                 | Dose: _____ mg                                                       | Given every ___ hour(s) |
| <input type="checkbox"/> Other (record on the Additional Medication Log) |                                                                      |                         |



**PREMATURITY AND RESPIRATORY OUTCOMES PROGRAM**

PID: \_\_\_\_\_

**DAILY GROWTH AND NUTRITION / DAILY MEDICATION DATA**

DATE: \_\_\_\_ / \_\_\_\_ / \_\_\_\_

WEEK \_\_\_\_ / DAY \_\_\_\_

**NOTE:** If utilizing a combination therapy drug, record the individual components in their respective drug categories. For example Aldactazide (Spironolactone and Hydrochlorothiazide) would be recorded as Spironolactone and Hydrochlorothiazide.

9. Diuretic drugs: <sub>0</sub> No <sub>1</sub> Yes

9a. If **Yes**, check all that apply:

- Furosemide      Dose: \_\_\_\_\_ mg      Given every \_\_\_\_ hour(s)      Route: <sub>1</sub> PO (oral)  
<sub>2</sub> IV (intravenous)
- Bumetanide      Dose: \_\_\_\_\_ mg      Given every \_\_\_\_ hour(s)      Route: <sub>1</sub> PO (oral)  
<sub>2</sub> IV (intravenous)
- Chlorothiazide      Dose: \_\_\_\_\_ mg      Given every \_\_\_\_ hour(s)      Route: <sub>1</sub> PO (oral)  
<sub>2</sub> IV (intravenous)
- Hydrochlorothiazide      Dose: \_\_\_\_\_ mg      Given every \_\_\_\_ hour(s)
- Spironolactone      Dose: \_\_\_\_\_ mg      Given every \_\_\_\_ hour(s)
- Metolazone      Dose: \_\_\_\_\_ mg      Given every \_\_\_\_ hour(s)
- Other (*record on the Additional Medication Log*)

10. Cardiovascular drugs: <sub>0</sub> No <sub>1</sub> Yes

10a. If **Yes**, check all that apply:

- Epinephrine Infusion       Vasopressin
- Dopamine Infusion       Norepinephrine
- Dobutamine Infusion

11. Other Cardio/Respiratory drugs: <sub>0</sub> No <sub>1</sub> Yes

11a. If **Yes**, check all that apply:

- Vitamin A IM or Oral       Other pulmonary vasodilators for treatment  
(for prevention of BPD)      of pulmonary hypertension other than Nitric Oxide
- Surfactant       Mucolytic
- Sildenafil       Dornase alfa
- Milrinone

12. Neuro-Muscular Blocking Agent: <sub>0</sub> No <sub>1</sub> Yes

13. Antimicrobial drugs and other agents to prevent infections: <sub>0</sub> No <sub>1</sub> Yes

13a. If **Yes**, check all that apply:

- Antibacterial
- Antifungal



**PREMATURITY AND RESPIRATORY OUTCOMES PROGRAM**

PID: \_\_\_\_\_

**DAILY GROWTH AND NUTRITION / DAILY MEDICATION DATA**

DATE: \_\_\_ / \_\_\_ / \_\_\_\_\_

WEEK \_\_\_ / DAY \_\_\_

- Antiviral
- Palivizumab
- Probiotic

14. Anxiolytic, Anticonvulsant, and Narcotic Analgesic drugs: <sub>0</sub> No <sub>1</sub> Yes

14a. If **Yes**, check all that apply:

- Benzodiazepines
- Phenobarbital
- Phenytoin
- Levetiracetam
- Morphine
- Fentanyl
- Methadone
- Dexmedetomidine

15. Anti-Gastroesophageal Reflux drugs: <sub>0</sub> No <sub>1</sub> Yes

15a. If **Yes**, check all that apply:

- Proton Pump Inhibitors
- H<sub>2</sub> Receptor Antagonists
- Motility agents
- Other

16. Use of blood products and Hematologic Supplements: <sub>0</sub> No <sub>1</sub> Yes

16a. If **Yes**, check all that apply:

- Erythropoietin
- Red Blood Cell Transfusion
- Platelets
- Iron Supplements

17. Oral Vitamins and Electrolyte Supplements: <sub>0</sub> No <sub>1</sub> Yes

17a. If **Yes**, check all that apply:

- Vitamin D
- Vitamin E
- Multivitamin
- Potassium Supplement
- Sodium Supplement



# PREMATURITY AND RESPIRATORY OUTCOMES PROGRAM

PID: \_\_\_\_\_

## DAILY RESPIRATORY DATA

DATE: \_\_\_ / \_\_\_ / \_\_\_\_\_

WEEK \_\_\_ / DAY \_\_\_

1. Did the baby receive any supplemental oxygen today? <sub>0</sub> No <sub>1</sub> Yes

1a. If **Yes**, how long was supplemental oxygen used for? <sub>1</sub> 12 hours or less  
<sub>2</sub> More than 12 hours

1b. What was the concentration of supplemental oxygen at 1200 (Noon) today? \_\_\_\_\_ %

2. Did the baby receive any other respiratory support today? <sub>0</sub> No <sub>1</sub> Yes

If Questions 1 or 2 are **Yes**, answer questions 3 – 6.

3. Was Positive Airway Pressure with Endotracheal Tube used today? <sub>0</sub> No <sub>1</sub> Yes

3a. If **Yes**, select ventilation mode and record the associated values at 1200 (Noon) or closest recorded data to 12 (Noon) if noon data are not available.

Conventional Mechanical Ventilation (CMV):  
Mean Airway Pressure (MAP): \_\_\_\_\_ cmH<sub>2</sub>O  
Positive End Expiratory Pressure (PEEP): \_\_\_\_\_ cmH<sub>2</sub>O

High Frequency Oscillation:  
MAP: \_\_\_\_\_ cmH<sub>2</sub>O

High Frequency Jet Ventilation:  
MAP: \_\_\_\_\_ cmH<sub>2</sub>O

4. Was Respiratory support without Endotracheal Tube used today? <sub>0</sub> No <sub>1</sub> Yes

4a. If **Yes**, select ventilation mode and record the associated values at 1200 (Noon) or closest recorded data to 12 (Noon) if noon data are not available.

Nasal Intermittent Mandatory Ventilation (NIMV):  
MAP: \_\_\_\_\_ cmH<sub>2</sub>O  
PEEP: \_\_\_\_\_ cmH<sub>2</sub>O

Continuous Positive Airway Pressure (CPAP):  
CPAP: \_\_\_\_\_ cmH<sub>2</sub>O

Nasal Cannula with flow rate:  
Nasal Cannula Flow: \_\_\_\_\_ Lpm

5. Was inhaled nitric oxide given today? <sub>0</sub> No <sub>1</sub> Yes

5a. If **Yes**, record the concentration at 1200 (Noon) or closest recorded data to 12 (Noon) if noon data are not available. \_\_\_\_\_ ppm

6. Was the baby reintubated today? <sub>0</sub> No <sub>1</sub> Yes

6a. If **Yes**, indicate the primary reason why the baby was reintubated:

- <sub>1</sub> Increasing respiratory distress
- <sub>2</sub> Stridor
- <sub>3</sub> Apnea and Bradycardia
- <sub>4</sub> Suspected infection
- <sub>5</sub> For diagnostic or therapeutic procedures, including surgery
- <sub>6</sub> Unplanned extubation(s), indicate the number of occurrences this day: \_\_\_\_\_
- <sub>98</sub> Other, specify: \_\_\_\_\_



PREMATURITY AND RESPIRATORY OUTCOMES PROGRAM

PID: \_\_\_\_\_

DAILY GROWTH AND NUTRITION / DAILY MEDICATION DATA

DATE: \_\_\_ / \_\_\_ / \_\_\_\_\_

WEEK \_\_\_ / DAY \_\_\_

Daily Growth and Nutrition Data

For question 1 and 2: If more than one measurement is taken on the same day, enter the first value obtained.

- 1. What was the baby's body weight?      \_\_\_ \_\_\_ \_\_\_ gms      <sub>99</sub> Not done
- 2. What was the baby's head circumference?      \_\_\_ . \_\_\_ cm      <sub>99</sub> Not done
- 3. How much milk did the baby receive today?      <sub>0</sub> None  
<sub>1</sub> Partial Feed  
<sub>2</sub> Full Feed (no parenteral nutrition on this day)
- 3a. If **Partial** or **Full** milk feed, indicate the type of milk provided:      <sub>1</sub> Human milk  
<sub>2</sub> Formula  
<sub>3</sub> Both

Daily Medication Data

- 4. Were any drugs given today?      <sub>0</sub> No      <sub>1</sub> Yes

If **Yes**, indicate which of the following drugs were given today:

- 5. Methylxanthine drugs:      <sub>0</sub> No      <sub>1</sub> Yes

5a. If **Yes**, choose one:

- <sub>1</sub> Caffeine Citrate\*      Dose: \_\_\_\_\_ mg      Given every \_\_\_ hour(s)      Route: <sub>1</sub> PO (oral)  
<sub>2</sub> IV (intravenous)
- <sub>2</sub> Aminophylline      Dose: \_\_\_\_\_ mg      Given every \_\_\_ hour(s)
- <sub>3</sub> Theophylline      Dose: \_\_\_\_\_ mg      Given every \_\_\_ hour(s)
- <sub>98</sub> Other (record on the Additional Medication Log)

\* If your site calculates the dose of Anhydrous Caffeine Base rather than Caffeine Citrate, multiply the Caffeine Base dose by 2.

- 6. Systemic Corticosteroid drugs:      <sub>0</sub> No      <sub>1</sub> Yes

6a. If **Yes**, check all that apply:

- Hydrocortisone      Dose: \_\_\_\_\_ mg      Given every \_\_\_ hour(s)      Route: <sub>1</sub> PO (oral)  
<sub>2</sub> IV (intravenous)
- Dexamethasone      Dose: \_\_\_\_\_ mg      Given every \_\_\_ hour(s)      Route: <sub>1</sub> PO (oral)  
<sub>2</sub> IV (intravenous)
- Prednisone / Prednisolone      Dose: \_\_\_\_\_ mg      Given every \_\_\_ hour(s)
- Methylprednisolone      Dose: \_\_\_\_\_ mg      Given every \_\_\_ hour(s)
- Other (record on the Additional Medication Log)





**PREMATURITY AND RESPIRATORY OUTCOMES PROGRAM**

PID: \_\_\_\_\_

**DAILY GROWTH AND NUTRITION / DAILY MEDICATION DATA**

DATE: \_\_\_ / \_\_\_ / \_\_\_\_\_

WEEK \_\_\_ / DAY \_\_\_

**NOTE:** If utilizing a combination therapy drug, record the individual components in their respective drug categories. For example Symbicort (budesonide and formoterol) would be recorded as budesonide – Inhaled Steroid and formoterol – Inhaled Bronchodilator.

7. Inhaled Steroid drugs: <sub>0</sub> No <sub>1</sub> Yes

7a. If **Yes**, check all that apply:

- |                                                                          |             |                              |                             |                         |
|--------------------------------------------------------------------------|-------------|------------------------------|-----------------------------|-------------------------|
| <input type="checkbox"/> Budesonide (Nebulized or MDI)                   | Dose: _____ | <input type="checkbox"/> mcg | <input type="checkbox"/> mg | Given every ___ hour(s) |
| <input type="checkbox"/> Beclomethasone (MDI)                            | Dose: _____ | mcg                          |                             | Given every ___ hour(s) |
| <input type="checkbox"/> Ciclesonide (MDI)                               | Dose: _____ | mcg                          |                             | Given every ___ hour(s) |
| <input type="checkbox"/> Flunisolide (MDI)                               | Dose: _____ | mcg                          |                             | Given every ___ hour(s) |
| <input type="checkbox"/> Fluticasone (MDI)                               | Dose: _____ | mcg                          |                             | Given every ___ hour(s) |
| <input type="checkbox"/> Mometasone (MDI)                                | Dose: _____ | mcg                          |                             | Given every ___ hour(s) |
| <input type="checkbox"/> Triamcinolone (MDI)                             | Dose: _____ | mcg                          |                             | Given every ___ hour(s) |
| <input type="checkbox"/> Dexamethasone (Nebulized)                       | Dose: _____ | mg                           |                             | Given every ___ hour(s) |
| <input type="checkbox"/> Other (record on the Additional Medication Log) |             |                              |                             |                         |

If route of administration is Metered Dose Inhalator (MDI), calculate dose by multiplying the number of puffs by strength per puff.

8. Inhaled Bronchodilator drugs: <sub>0</sub> No <sub>1</sub> Yes

8a. If **Yes**, check all that apply:

- |                                                                          |             |                              |                             |                         |
|--------------------------------------------------------------------------|-------------|------------------------------|-----------------------------|-------------------------|
| <input type="checkbox"/> Albuterol (Nebulized or MDI)                    | Dose: _____ | <input type="checkbox"/> mcg | <input type="checkbox"/> mg | Given every ___ hour(s) |
| <input type="checkbox"/> Levalbuterol (Nebulized or MDI)                 | Dose: _____ | <input type="checkbox"/> mcg | <input type="checkbox"/> mg | Given every ___ hour(s) |
| <input type="checkbox"/> Ipratropium bromide<br>(Nebulized or MDI)       | Dose: _____ | <input type="checkbox"/> mcg | <input type="checkbox"/> mg | Given every ___ hour(s) |
| <input type="checkbox"/> Formoterol                                      | Dose: _____ | mcg                          |                             | Given every ___ hour(s) |
| <input type="checkbox"/> Racemic epinephrine (Nebulized)                 | Dose: _____ | mg                           |                             | Given every ___ hour(s) |
| <input type="checkbox"/> Other (record on the Additional Medication Log) |             |                              |                             |                         |





**PREMATURITY AND RESPIRATORY OUTCOMES PROGRAM**

PID: \_\_\_\_\_

**DAILY GROWTH AND NUTRITION / DAILY MEDICATION DATA**

DATE: \_\_\_ / \_\_\_ / \_\_\_\_\_

WEEK \_\_\_ / DAY \_\_\_

- Antiviral
- Palivizumab
- Probiotic

14. Anxiolytic, Anticonvulsant, and Narcotic Analgesic drugs: <sub>0</sub> No <sub>1</sub> Yes

14a. If **Yes**, check all that apply:

- Benzodiazepines
- Phenobarbital
- Phenytoin
- Levetiracetam
- Morphine
- Fentanyl
- Methadone
- Dexmedetomidine

15. Anti-Gastroesophageal Reflux drugs: <sub>0</sub> No <sub>1</sub> Yes

15a. If **Yes**, check all that apply:

- Proton Pump Inhibitors
- H<sub>2</sub> Receptor Antagonists
- Motility agents
- Other

16. Use of blood products and Hematologic Supplements: <sub>0</sub> No <sub>1</sub> Yes

16a. If **Yes**, check all that apply:

- Erythropoietin
- Red Blood Cell Transfusion
- Platelets
- Iron Supplements

17. Oral Vitamins and Electrolyte Supplements: <sub>0</sub> No <sub>1</sub> Yes

17a. If **Yes**, check all that apply:

- Vitamin D
- Vitamin E
- Multivitamin
- Potassium Supplement
- Sodium Supplement



# PREMATURITY AND RESPIRATORY OUTCOMES PROGRAM

PID: \_\_\_\_\_

## DAILY RESPIRATORY DATA

DATE: \_\_\_ / \_\_\_ / \_\_\_\_\_

WEEK \_\_\_ / DAY \_\_\_

1. Did the baby receive any supplemental oxygen today? <sub>0</sub> No <sub>1</sub> Yes

1a. If **Yes**, how long was supplemental oxygen used for? <sub>1</sub> 12 hours or less  
<sub>2</sub> More than 12 hours

1b. What was the concentration of supplemental oxygen at 1200 (Noon) today? \_\_\_\_\_ %

2. Did the baby receive any other respiratory support today? <sub>0</sub> No <sub>1</sub> Yes

If Questions 1 or 2 are **Yes**, answer questions 3 – 6.

3. Was Positive Airway Pressure with Endotracheal Tube used today? <sub>0</sub> No <sub>1</sub> Yes

3a. If **Yes**, select ventilation mode and record the associated values at 1200 (Noon) or closest recorded data to 12 (Noon) if noon data are not available.

Conventional Mechanical Ventilation (CMV):  
Mean Airway Pressure (MAP): \_\_\_\_\_ cmH<sub>2</sub>O  
Positive End Expiratory Pressure (PEEP): \_\_\_\_\_ cmH<sub>2</sub>O

High Frequency Oscillation:  
MAP: \_\_\_\_\_ cmH<sub>2</sub>O

High Frequency Jet Ventilation:  
MAP: \_\_\_\_\_ cmH<sub>2</sub>O

4. Was Respiratory support without Endotracheal Tube used today? <sub>0</sub> No <sub>1</sub> Yes

4a. If **Yes**, select ventilation mode and record the associated values at 1200 (Noon) or closest recorded data to 12 (Noon) if noon data are not available.

Nasal Intermittent Mandatory Ventilation (NIMV):  
MAP: \_\_\_\_\_ cmH<sub>2</sub>O  
PEEP: \_\_\_\_\_ cmH<sub>2</sub>O

Continuous Positive Airway Pressure (CPAP):  
CPAP: \_\_\_\_\_ cmH<sub>2</sub>O

Nasal Cannula with flow rate:  
Nasal Cannula Flow: \_\_\_\_\_ Lpm

5. Was inhaled nitric oxide given today? <sub>0</sub> No <sub>1</sub> Yes

5a. If **Yes**, record the concentration at 1200 (Noon) or closest recorded data to 12 (Noon) if noon data are not available. \_\_\_\_\_ ppm

6. Was the baby reintubated today? <sub>0</sub> No <sub>1</sub> Yes

6a. If **Yes**, indicate the primary reason why the baby was reintubated:

- <sub>1</sub> Increasing respiratory distress
- <sub>2</sub> Stridor
- <sub>3</sub> Apnea and Bradycardia
- <sub>4</sub> Suspected infection
- <sub>5</sub> For diagnostic or therapeutic procedures, including surgery
- <sub>6</sub> Unplanned extubation(s), indicate the number of occurrences this day: \_\_\_\_\_
- <sub>98</sub> Other, specify: \_\_\_\_\_



PREMATURITY AND RESPIRATORY OUTCOMES PROGRAM

PID: \_\_\_\_\_

DAILY GROWTH AND NUTRITION / DAILY MEDICATION DATA

DATE: \_\_\_ / \_\_\_ / \_\_\_\_\_

WEEK \_\_\_ / DAY \_\_\_

Daily Growth and Nutrition Data

For question 1 and 2: If more than one measurement is taken on the same day, enter the first value obtained.

- 1. What was the baby's body weight?      \_\_\_ \_\_\_ \_\_\_ gms      <sub>99</sub> Not done
- 2. What was the baby's head circumference?      \_\_\_ . \_\_\_ cm      <sub>99</sub> Not done
- 3. How much milk did the baby receive today?      <sub>0</sub> None  
<sub>1</sub> Partial Feed  
<sub>2</sub> Full Feed (no parenteral nutrition on this day)
- 3a. If **Partial** or **Full** milk feed, indicate the type of milk provided:      <sub>1</sub> Human milk  
<sub>2</sub> Formula  
<sub>3</sub> Both

Daily Medication Data

- 4. Were any drugs given today?      <sub>0</sub> No      <sub>1</sub> Yes

If **Yes**, indicate which of the following drugs were given today:

- 5. Methylxanthine drugs:      <sub>0</sub> No      <sub>1</sub> Yes

5a. If **Yes**, choose one:

- <sub>1</sub> Caffeine Citrate\*      Dose: \_\_\_\_\_ mg      Given every \_\_\_ hour(s)      Route: <sub>1</sub> PO (oral)  
<sub>2</sub> IV (intravenous)
- <sub>2</sub> Aminophylline      Dose: \_\_\_\_\_ mg      Given every \_\_\_ hour(s)
- <sub>3</sub> Theophylline      Dose: \_\_\_\_\_ mg      Given every \_\_\_ hour(s)
- <sub>98</sub> Other (record on the Additional Medication Log)

\* If your site calculates the dose of Anhydrous Caffeine Base rather than Caffeine Citrate, multiply the Caffeine Base dose by 2.

- 6. Systemic Corticosteroid drugs:      <sub>0</sub> No      <sub>1</sub> Yes

6a. If **Yes**, check all that apply:

- Hydrocortisone      Dose: \_\_\_\_\_ mg      Given every \_\_\_ hour(s)      Route: <sub>1</sub> PO (oral)  
<sub>2</sub> IV (intravenous)
- Dexamethasone      Dose: \_\_\_\_\_ mg      Given every \_\_\_ hour(s)      Route: <sub>1</sub> PO (oral)  
<sub>2</sub> IV (intravenous)
- Prednisone / Prednisolone      Dose: \_\_\_\_\_ mg      Given every \_\_\_ hour(s)
- Methylprednisolone      Dose: \_\_\_\_\_ mg      Given every \_\_\_ hour(s)
- Other (record on the Additional Medication Log)



**PREMATURITY AND RESPIRATORY OUTCOMES PROGRAM**

PID: \_\_\_\_\_

**DAILY GROWTH AND NUTRITION / DAILY MEDICATION DATA**

DATE: \_\_\_ / \_\_\_ / \_\_\_\_\_

WEEK \_\_\_ / DAY \_\_\_

**NOTE:** If utilizing a combination therapy drug, record the individual components in their respective drug categories. For example Symbicort (budesonide and formoterol) would be recorded as budesonide – Inhaled Steroid and formoterol – Inhaled Bronchodilator.

7. Inhaled Steroid drugs: <sub>0</sub> No <sub>1</sub> Yes

7a. If **Yes**, check all that apply:

- |                                                                          |                                                                      |                         |
|--------------------------------------------------------------------------|----------------------------------------------------------------------|-------------------------|
| <input type="checkbox"/> Budesonide (Nebulized or MDI)                   | Dose: _____ <input type="checkbox"/> mcg <input type="checkbox"/> mg | Given every ___ hour(s) |
| <input type="checkbox"/> Beclomethasone (MDI)                            | Dose: _____ mcg                                                      | Given every ___ hour(s) |
| <input type="checkbox"/> Ciclesonide (MDI)                               | Dose: _____ mcg                                                      | Given every ___ hour(s) |
| <input type="checkbox"/> Flunisolide (MDI)                               | Dose: _____ mcg                                                      | Given every ___ hour(s) |
| <input type="checkbox"/> Fluticasone (MDI)                               | Dose: _____ mcg                                                      | Given every ___ hour(s) |
| <input type="checkbox"/> Mometasone (MDI)                                | Dose: _____ mcg                                                      | Given every ___ hour(s) |
| <input type="checkbox"/> Triamcinolone (MDI)                             | Dose: _____ mcg                                                      | Given every ___ hour(s) |
| <input type="checkbox"/> Dexamethasone (Nebulized)                       | Dose: _____ mg                                                       | Given every ___ hour(s) |
| <input type="checkbox"/> Other (record on the Additional Medication Log) |                                                                      |                         |

If route of administration is Metered Dose Inhalator (MDI), calculate dose by multiplying the number of puffs by strength per puff.

8. Inhaled Bronchodilator drugs: <sub>0</sub> No <sub>1</sub> Yes

8a. If **Yes**, check all that apply:

- |                                                                          |                                                                      |                         |
|--------------------------------------------------------------------------|----------------------------------------------------------------------|-------------------------|
| <input type="checkbox"/> Albuterol (Nebulized or MDI)                    | Dose: _____ <input type="checkbox"/> mcg <input type="checkbox"/> mg | Given every ___ hour(s) |
| <input type="checkbox"/> Levalbuterol (Nebulized or MDI)                 | Dose: _____ <input type="checkbox"/> mcg <input type="checkbox"/> mg | Given every ___ hour(s) |
| <input type="checkbox"/> Ipratropium bromide<br>(Nebulized or MDI)       | Dose: _____ <input type="checkbox"/> mcg <input type="checkbox"/> mg | Given every ___ hour(s) |
| <input type="checkbox"/> Formoterol                                      | Dose: _____ mcg                                                      | Given every ___ hour(s) |
| <input type="checkbox"/> Racemic epinephrine (Nebulized)                 | Dose: _____ mg                                                       | Given every ___ hour(s) |
| <input type="checkbox"/> Other (record on the Additional Medication Log) |                                                                      |                         |





**PREMATURITY AND RESPIRATORY OUTCOMES PROGRAM**

PID: \_\_\_\_\_

**DAILY GROWTH AND NUTRITION / DAILY MEDICATION DATA**

DATE: \_\_\_ / \_\_\_ / \_\_\_\_\_

WEEK \_\_\_ / DAY \_\_\_

- Antiviral
- Palivizumab
- Probiotic

14. Anxiolytic, Anticonvulsant, and Narcotic Analgesic drugs: <sub>0</sub> No <sub>1</sub> Yes

14a. If **Yes**, check all that apply:

- Benzodiazepines
- Phenobarbital
- Phenytoin
- Levetiracetam
- Morphine
- Fentanyl
- Methadone
- Dexmedetomidine

15. Anti-Gastroesophageal Reflux drugs: <sub>0</sub> No <sub>1</sub> Yes

15a. If **Yes**, check all that apply:

- Proton Pump Inhibitors
- H<sub>2</sub> Receptor Antagonists
- Motility agents
- Other

16. Use of blood products and Hematologic Supplements: <sub>0</sub> No <sub>1</sub> Yes

16a. If **Yes**, check all that apply:

- Erythropoietin
- Red Blood Cell Transfusion
- Platelets
- Iron Supplements

17. Oral Vitamins and Electrolyte Supplements: <sub>0</sub> No <sub>1</sub> Yes

17a. If **Yes**, check all that apply:

- Vitamin D
- Vitamin E
- Multivitamin
- Potassium Supplement
- Sodium Supplement





# PREMATURITY AND RESPIRATORY OUTCOMES PROGRAM

PID: \_\_\_\_\_

## DAILY RESPIRATORY DATA

DATE: \_\_\_ / \_\_\_ / \_\_\_\_\_

WEEK \_\_\_ / DAY \_\_\_

1. Did the baby receive any supplemental oxygen today? <sub>0</sub> No <sub>1</sub> Yes

1a. If **Yes**, how long was supplemental oxygen used for? <sub>1</sub> 12 hours or less  
<sub>2</sub> More than 12 hours

1b. What was the concentration of supplemental oxygen at 1200 (Noon) today? \_\_\_\_\_ %

2. Did the baby receive any other respiratory support today? <sub>0</sub> No <sub>1</sub> Yes

If Questions 1 or 2 are **Yes**, answer questions 3 – 6.

3. Was Positive Airway Pressure with Endotracheal Tube used today? <sub>0</sub> No <sub>1</sub> Yes

3a. If **Yes**, select ventilation mode and record the associated values at 1200 (Noon) or closest recorded data to 12 (Noon) if noon data are not available.

Conventional Mechanical Ventilation (CMV):  
Mean Airway Pressure (MAP): \_\_\_\_\_ cmH<sub>2</sub>O  
Positive End Expiratory Pressure (PEEP): \_\_\_\_\_ cmH<sub>2</sub>O

High Frequency Oscillation:  
MAP: \_\_\_\_\_ cmH<sub>2</sub>O

High Frequency Jet Ventilation:  
MAP: \_\_\_\_\_ cmH<sub>2</sub>O

4. Was Respiratory support without Endotracheal Tube used today? <sub>0</sub> No <sub>1</sub> Yes

4a. If **Yes**, select ventilation mode and record the associated values at 1200 (Noon) or closest recorded data to 12 (Noon) if noon data are not available.

Nasal Intermittent Mandatory Ventilation (NIMV):  
MAP: \_\_\_\_\_ cmH<sub>2</sub>O  
PEEP: \_\_\_\_\_ cmH<sub>2</sub>O

Continuous Positive Airway Pressure (CPAP):  
CPAP: \_\_\_\_\_ cmH<sub>2</sub>O

Nasal Cannula with flow rate:  
Nasal Cannula Flow: \_\_\_\_\_ Lpm

5. Was inhaled nitric oxide given today? <sub>0</sub> No <sub>1</sub> Yes

5a. If **Yes**, record the concentration at 1200 (Noon) or closest recorded data to 12 (Noon) if noon data are not available. \_\_\_\_\_ ppm

6. Was the baby reintubated today? <sub>0</sub> No <sub>1</sub> Yes

6a. If **Yes**, indicate the primary reason why the baby was reintubated:

- <sub>1</sub> Increasing respiratory distress
- <sub>2</sub> Stridor
- <sub>3</sub> Apnea and Bradycardia
- <sub>4</sub> Suspected infection
- <sub>5</sub> For diagnostic or therapeutic procedures, including surgery
- <sub>6</sub> Unplanned extubation(s), indicate the number of occurrences this day: \_\_\_\_\_
- <sub>98</sub> Other, specify: \_\_\_\_\_



**PREMATURITY AND RESPIRATORY OUTCOMES PROGRAM**

PID: \_\_\_\_\_

**DAILY GROWTH AND NUTRITION / DAILY MEDICATION DATA**

DATE: \_\_\_ / \_\_\_ / \_\_\_\_\_

WEEK \_\_\_ / DAY \_\_\_

Daily Growth and Nutrition Data

For question 1 and 2: If more than one measurement is taken on the same day, enter the first value obtained.

- 1. What was the baby's body weight?      \_\_\_ \_\_\_ \_\_\_ gms      <sub>99</sub> Not done
- 2. What was the baby's head circumference?      \_\_\_ . \_\_\_ cm      <sub>99</sub> Not done
- 3. How much milk did the baby receive today?      <sub>0</sub> None  
<sub>1</sub> Partial Feed  
<sub>2</sub> Full Feed (no parenteral nutrition on this day)
- 3a. If **Partial** or **Full** milk feed, indicate the type of milk provided:      <sub>1</sub> Human milk  
<sub>2</sub> Formula  
<sub>3</sub> Both

Daily Medication Data

- 4. Were any drugs given today?      <sub>0</sub> No      <sub>1</sub> Yes

If **Yes**, indicate which of the following drugs were given today:

- 5. Methylxanthine drugs:      <sub>0</sub> No      <sub>1</sub> Yes

5a. If **Yes**, choose one:

- <sub>1</sub> Caffeine Citrate\*      Dose: \_\_\_\_\_ mg      Given every \_\_\_ hour(s)      Route: <sub>1</sub> PO (oral)  
<sub>2</sub> IV (intravenous)
- <sub>2</sub> Aminophylline      Dose: \_\_\_\_\_ mg      Given every \_\_\_ hour(s)
- <sub>3</sub> Theophylline      Dose: \_\_\_\_\_ mg      Given every \_\_\_ hour(s)
- <sub>98</sub> Other (record on the Additional Medication Log)

\* If your site calculates the dose of Anhydrous Caffeine Base rather than Caffeine Citrate, multiply the Caffeine Base dose by 2.

- 6. Systemic Corticosteroid drugs:      <sub>0</sub> No      <sub>1</sub> Yes

6a. If **Yes**, check all that apply:

- Hydrocortisone      Dose: \_\_\_\_\_ mg      Given every \_\_\_ hour(s)      Route: <sub>1</sub> PO (oral)  
<sub>2</sub> IV (intravenous)
- Dexamethasone      Dose: \_\_\_\_\_ mg      Given every \_\_\_ hour(s)      Route: <sub>1</sub> PO (oral)  
<sub>2</sub> IV (intravenous)
- Prednisone / Prednisolone      Dose: \_\_\_\_\_ mg      Given every \_\_\_ hour(s)
- Methylprednisolone      Dose: \_\_\_\_\_ mg      Given every \_\_\_ hour(s)
- Other (record on the Additional Medication Log)



**PREMATURITY AND RESPIRATORY OUTCOMES PROGRAM**

PID: \_\_\_\_\_

**DAILY GROWTH AND NUTRITION / DAILY MEDICATION DATA**

DATE: \_\_\_ / \_\_\_ / \_\_\_\_\_

WEEK \_\_\_ / DAY \_\_\_

**NOTE:** If utilizing a combination therapy drug, record the individual components in their respective drug categories. For example Symbicort (budesonide and formoterol) would be recorded as budesonide – Inhaled Steroid and formoterol – Inhaled Bronchodilator.

7. Inhaled Steroid drugs: <sub>0</sub> No <sub>1</sub> Yes

7a. If **Yes**, check all that apply:

- |                                                                          |             |                              |                             |                         |
|--------------------------------------------------------------------------|-------------|------------------------------|-----------------------------|-------------------------|
| <input type="checkbox"/> Budesonide (Nebulized or MDI)                   | Dose: _____ | <input type="checkbox"/> mcg | <input type="checkbox"/> mg | Given every ___ hour(s) |
| <input type="checkbox"/> Beclomethasone (MDI)                            | Dose: _____ | mcg                          |                             | Given every ___ hour(s) |
| <input type="checkbox"/> Ciclesonide (MDI)                               | Dose: _____ | mcg                          |                             | Given every ___ hour(s) |
| <input type="checkbox"/> Flunisolide (MDI)                               | Dose: _____ | mcg                          |                             | Given every ___ hour(s) |
| <input type="checkbox"/> Fluticasone (MDI)                               | Dose: _____ | mcg                          |                             | Given every ___ hour(s) |
| <input type="checkbox"/> Mometasone (MDI)                                | Dose: _____ | mcg                          |                             | Given every ___ hour(s) |
| <input type="checkbox"/> Triamcinolone (MDI)                             | Dose: _____ | mcg                          |                             | Given every ___ hour(s) |
| <input type="checkbox"/> Dexamethasone (Nebulized)                       | Dose: _____ | mg                           |                             | Given every ___ hour(s) |
| <input type="checkbox"/> Other (record on the Additional Medication Log) |             |                              |                             |                         |

If route of administration is Metered Dose Inhalator (MDI), calculate dose by multiplying the number of puffs by strength per puff.

8. Inhaled Bronchodilator drugs: <sub>0</sub> No <sub>1</sub> Yes

8a. If **Yes**, check all that apply:

- |                                                                          |             |                              |                             |                         |
|--------------------------------------------------------------------------|-------------|------------------------------|-----------------------------|-------------------------|
| <input type="checkbox"/> Albuterol (Nebulized or MDI)                    | Dose: _____ | <input type="checkbox"/> mcg | <input type="checkbox"/> mg | Given every ___ hour(s) |
| <input type="checkbox"/> Levalbuterol (Nebulized or MDI)                 | Dose: _____ | <input type="checkbox"/> mcg | <input type="checkbox"/> mg | Given every ___ hour(s) |
| <input type="checkbox"/> Ipratropium bromide<br>(Nebulized or MDI)       | Dose: _____ | <input type="checkbox"/> mcg | <input type="checkbox"/> mg | Given every ___ hour(s) |
| <input type="checkbox"/> Formoterol                                      | Dose: _____ | mcg                          |                             | Given every ___ hour(s) |
| <input type="checkbox"/> Racemic epinephrine (Nebulized)                 | Dose: _____ | mg                           |                             | Given every ___ hour(s) |
| <input type="checkbox"/> Other (record on the Additional Medication Log) |             |                              |                             |                         |



**PREMATURITY AND RESPIRATORY OUTCOMES PROGRAM**

PID: \_\_\_\_\_

**DAILY GROWTH AND NUTRITION / DAILY MEDICATION DATA**

DATE: \_\_\_ / \_\_\_ / \_\_\_\_\_

WEEK \_\_\_ / DAY \_\_\_

**NOTE:** If utilizing a combination therapy drug, record the individual components in their respective drug categories. For example Aldactazide (Spironolactone and Hydrochlorothiazide) would be recorded as Spironolactone and Hydrochlorothiazide.

9. Diuretic drugs: <sub>0</sub> No <sub>1</sub> Yes

9a. If **Yes**, check all that apply:

- Furosemide Dose: \_\_\_\_\_ mg Given every \_\_\_ hour(s) Route: <sub>1</sub> PO (oral)  
<sub>2</sub> IV (intravenous)
- Bumetanide Dose: \_\_\_\_\_ mg Given every \_\_\_ hour(s) Route: <sub>1</sub> PO (oral)  
<sub>2</sub> IV (intravenous)
- Chlorothiazide Dose: \_\_\_\_\_ mg Given every \_\_\_ hour(s) Route: <sub>1</sub> PO (oral)  
<sub>2</sub> IV (intravenous)
- Hydrochlorothiazide Dose: \_\_\_\_\_ mg Given every \_\_\_ hour(s)
- Spironolactone Dose: \_\_\_\_\_ mg Given every \_\_\_ hour(s)
- Metolazone Dose: \_\_\_\_\_ mg Given every \_\_\_ hour(s)
- Other (record on the Additional Medication Log)

10. Cardiovascular drugs: <sub>0</sub> No <sub>1</sub> Yes

10a. If **Yes**, check all that apply:

- Epinephrine Infusion  Vasopressin
- Dopamine Infusion  Norepinephrine
- Dobutamine Infusion

11. Other Cardio/Respiratory drugs: <sub>0</sub> No <sub>1</sub> Yes

11a. If **Yes**, check all that apply:

- Vitamin A IM or Oral  Other pulmonary vasodilators for treatment  
(for prevention of BPD) of pulmonary hypertension other than Nitric Oxide
- Surfactant  Mucolytic
- Sildenafil  Dornase alfa
- Milrinone

12. Neuro-Muscular Blocking Agent: <sub>0</sub> No <sub>1</sub> Yes

13. Antimicrobial drugs and other agents to prevent infections: <sub>0</sub> No <sub>1</sub> Yes

13a. If **Yes**, check all that apply:

- Antibacterial
- Antifungal



**PREMATURITY AND RESPIRATORY OUTCOMES PROGRAM**

PID: \_\_\_\_\_

**DAILY GROWTH AND NUTRITION / DAILY MEDICATION DATA**

DATE: \_\_\_ / \_\_\_ / \_\_\_\_\_

WEEK \_\_\_ / DAY \_\_\_

- Antiviral
- Palivizumab
- Probiotic

14. Anxiolytic, Anticonvulsant, and Narcotic Analgesic drugs: <sub>0</sub> No <sub>1</sub> Yes

14a. If **Yes**, check all that apply:

- Benzodiazepines
- Phenobarbital
- Phenytoin
- Levetiracetam
- Morphine
- Fentanyl
- Methadone
- Dexmedetomidine

15. Anti-Gastroesophageal Reflux drugs: <sub>0</sub> No <sub>1</sub> Yes

15a. If **Yes**, check all that apply:

- Proton Pump Inhibitors
- H<sub>2</sub> Receptor Antagonists
- Motility agents
- Other

16. Use of blood products and Hematologic Supplements: <sub>0</sub> No <sub>1</sub> Yes

16a. If **Yes**, check all that apply:

- Erythropoietin
- Red Blood Cell Transfusion
- Platelets
- Iron Supplements

17. Oral Vitamins and Electrolyte Supplements: <sub>0</sub> No <sub>1</sub> Yes

17a. If **Yes**, check all that apply:

- Vitamin D
- Vitamin E
- Multivitamin
- Potassium Supplement
- Sodium Supplement



# PREMATURITY AND RESPIRATORY OUTCOMES PROGRAM

PID: \_\_\_\_\_

## DAILY RESPIRATORY DATA

DATE: \_\_\_ / \_\_\_ / \_\_\_\_\_

WEEK \_\_\_ / DAY \_\_\_

1. Did the baby receive any supplemental oxygen today? <sub>0</sub> No <sub>1</sub> Yes

1a. If **Yes**, how long was supplemental oxygen used for? <sub>1</sub> 12 hours or less  
<sub>2</sub> More than 12 hours

1b. What was the concentration of supplemental oxygen at 1200 (Noon) today? \_\_\_\_\_ %

2. Did the baby receive any other respiratory support today? <sub>0</sub> No <sub>1</sub> Yes

If Questions 1 or 2 are **Yes**, answer questions 3 – 6.

3. Was Positive Airway Pressure with Endotracheal Tube used today? <sub>0</sub> No <sub>1</sub> Yes

3a. If **Yes**, select ventilation mode and record the associated values at 1200 (Noon) or closest recorded data to 12 (Noon) if noon data are not available.

Conventional Mechanical Ventilation (CMV):  
Mean Airway Pressure (MAP): \_\_\_\_\_ cmH<sub>2</sub>O  
Positive End Expiratory Pressure (PEEP): \_\_\_\_\_ cmH<sub>2</sub>O

High Frequency Oscillation:  
MAP: \_\_\_\_\_ cmH<sub>2</sub>O

High Frequency Jet Ventilation:  
MAP: \_\_\_\_\_ cmH<sub>2</sub>O

4. Was Respiratory support without Endotracheal Tube used today? <sub>0</sub> No <sub>1</sub> Yes

4a. If **Yes**, select ventilation mode and record the associated values at 1200 (Noon) or closest recorded data to 12 (Noon) if noon data are not available.

Nasal Intermittent Mandatory Ventilation (NIMV):  
MAP: \_\_\_\_\_ cmH<sub>2</sub>O  
PEEP: \_\_\_\_\_ cmH<sub>2</sub>O

Continuous Positive Airway Pressure (CPAP):  
CPAP: \_\_\_\_\_ cmH<sub>2</sub>O

Nasal Cannula with flow rate:  
Nasal Cannula Flow: \_\_\_\_\_ Lpm

5. Was inhaled nitric oxide given today? <sub>0</sub> No <sub>1</sub> Yes

5a. If **Yes**, record the concentration at 1200 (Noon) or closest recorded data to 12 (Noon) if noon data are not available. \_\_\_\_\_ ppm

6. Was the baby reintubated today? <sub>0</sub> No <sub>1</sub> Yes

6a. If **Yes**, indicate the primary reason why the baby was reintubated:

- <sub>1</sub> Increasing respiratory distress
- <sub>2</sub> Stridor
- <sub>3</sub> Apnea and Bradycardia
- <sub>4</sub> Suspected infection
- <sub>5</sub> For diagnostic or therapeutic procedures, including surgery
- <sub>6</sub> Unplanned extubation(s), indicate the number of occurrences this day: \_\_\_\_\_
- <sub>98</sub> Other, specify: \_\_\_\_\_



PREMATURITY AND RESPIRATORY OUTCOMES PROGRAM

PID: \_\_\_\_\_

DAILY GROWTH AND NUTRITION / DAILY MEDICATION DATA

DATE: \_\_\_ / \_\_\_ / \_\_\_\_\_

WEEK \_\_\_ / DAY \_\_\_

Daily Growth and Nutrition Data

For question 1 and 2: If more than one measurement is taken on the same day, enter the first value obtained.

- 1. What was the baby's body weight?      \_\_\_ \_\_\_ \_\_\_ gms      <sub>99</sub> Not done
- 2. What was the baby's head circumference?      \_\_\_ . \_\_\_ cm      <sub>99</sub> Not done
- 3. How much milk did the baby receive today?      <sub>0</sub> None  
<sub>1</sub> Partial Feed  
<sub>2</sub> Full Feed (no parenteral nutrition on this day)
- 3a. If **Partial** or **Full** milk feed, indicate the type of milk provided:      <sub>1</sub> Human milk  
<sub>2</sub> Formula  
<sub>3</sub> Both

Daily Medication Data

- 4. Were any drugs given today?      <sub>0</sub> No      <sub>1</sub> Yes

If **Yes**, indicate which of the following drugs were given today:

- 5. Methylxanthine drugs:      <sub>0</sub> No      <sub>1</sub> Yes

5a. If **Yes**, choose one:

- <sub>1</sub> Caffeine Citrate\*      Dose: \_\_\_\_\_ mg      Given every \_\_\_ hour(s)      Route: <sub>1</sub> PO (oral)  
<sub>2</sub> IV (intravenous)
- <sub>2</sub> Aminophylline      Dose: \_\_\_\_\_ mg      Given every \_\_\_ hour(s)
- <sub>3</sub> Theophylline      Dose: \_\_\_\_\_ mg      Given every \_\_\_ hour(s)
- <sub>98</sub> Other (record on the Additional Medication Log)

\* If your site calculates the dose of Anhydrous Caffeine Base rather than Caffeine Citrate, multiply the Caffeine Base dose by 2.

- 6. Systemic Corticosteroid drugs:      <sub>0</sub> No      <sub>1</sub> Yes

6a. If **Yes**, check all that apply:

- Hydrocortisone      Dose: \_\_\_\_\_ mg      Given every \_\_\_ hour(s)      Route: <sub>1</sub> PO (oral)  
<sub>2</sub> IV (intravenous)
- Dexamethasone      Dose: \_\_\_\_\_ mg      Given every \_\_\_ hour(s)      Route: <sub>1</sub> PO (oral)  
<sub>2</sub> IV (intravenous)
- Prednisone / Prednisolone      Dose: \_\_\_\_\_ mg      Given every \_\_\_ hour(s)
- Methylprednisolone      Dose: \_\_\_\_\_ mg      Given every \_\_\_ hour(s)
- Other (record on the Additional Medication Log)



**PREMATURITY AND RESPIRATORY OUTCOMES PROGRAM**

PID: \_\_\_\_\_

**DAILY GROWTH AND NUTRITION / DAILY MEDICATION DATA**

DATE: \_\_\_ / \_\_\_ / \_\_\_\_\_

WEEK \_\_\_ / DAY \_\_\_

**NOTE:** If utilizing a combination therapy drug, record the individual components in their respective drug categories. For example Symbicort (budesonide and formoterol) would be recorded as budesonide – Inhaled Steroid and formoterol – Inhaled Bronchodilator.

7. Inhaled Steroid drugs: <sub>0</sub> No <sub>1</sub> Yes

7a. If **Yes**, check all that apply:

- |                                                                          |             |                              |                             |                           |
|--------------------------------------------------------------------------|-------------|------------------------------|-----------------------------|---------------------------|
| <input type="checkbox"/> Budesonide (Nebulized or MDI)                   | Dose: _____ | <input type="checkbox"/> mcg | <input type="checkbox"/> mg | Given every _____ hour(s) |
| <input type="checkbox"/> Beclomethasone (MDI)                            | Dose: _____ | mcg                          |                             | Given every _____ hour(s) |
| <input type="checkbox"/> Ciclesonide (MDI)                               | Dose: _____ | mcg                          |                             | Given every _____ hour(s) |
| <input type="checkbox"/> Flunisolide (MDI)                               | Dose: _____ | mcg                          |                             | Given every _____ hour(s) |
| <input type="checkbox"/> Fluticasone (MDI)                               | Dose: _____ | mcg                          |                             | Given every _____ hour(s) |
| <input type="checkbox"/> Mometasone (MDI)                                | Dose: _____ | mcg                          |                             | Given every _____ hour(s) |
| <input type="checkbox"/> Triamcinolone (MDI)                             | Dose: _____ | mcg                          |                             | Given every _____ hour(s) |
| <input type="checkbox"/> Dexamethasone (Nebulized)                       | Dose: _____ | mg                           |                             | Given every _____ hour(s) |
| <input type="checkbox"/> Other (record on the Additional Medication Log) |             |                              |                             |                           |

If route of administration is Metered Dose Inhalator (MDI), calculate dose by multiplying the number of puffs by strength per puff.

8. Inhaled Bronchodilator drugs: <sub>0</sub> No <sub>1</sub> Yes

8a. If **Yes**, check all that apply:

- |                                                                          |             |                              |                             |                           |
|--------------------------------------------------------------------------|-------------|------------------------------|-----------------------------|---------------------------|
| <input type="checkbox"/> Albuterol (Nebulized or MDI)                    | Dose: _____ | <input type="checkbox"/> mcg | <input type="checkbox"/> mg | Given every _____ hour(s) |
| <input type="checkbox"/> Levalbuterol (Nebulized or MDI)                 | Dose: _____ | <input type="checkbox"/> mcg | <input type="checkbox"/> mg | Given every _____ hour(s) |
| <input type="checkbox"/> Ipratropium bromide<br>(Nebulized or MDI)       | Dose: _____ | <input type="checkbox"/> mcg | <input type="checkbox"/> mg | Given every _____ hour(s) |
| <input type="checkbox"/> Formoterol                                      | Dose: _____ | mcg                          |                             | Given every _____ hour(s) |
| <input type="checkbox"/> Racemic epinephrine (Nebulized)                 | Dose: _____ | mg                           |                             | Given every _____ hour(s) |
| <input type="checkbox"/> Other (record on the Additional Medication Log) |             |                              |                             |                           |





**PREMATURITY AND RESPIRATORY OUTCOMES PROGRAM**

PID: \_\_\_\_\_

**DAILY GROWTH AND NUTRITION / DAILY MEDICATION DATA**

DATE: \_\_\_\_ / \_\_\_\_ / \_\_\_\_

WEEK \_\_\_\_ / DAY \_\_\_\_

**NOTE:** If utilizing a combination therapy drug, record the individual components in their respective drug categories. For example Aldactazide (Spironolactone and Hydrochlorothiazide) would be recorded as Spironolactone and Hydrochlorothiazide.

9. Diuretic drugs: <sub>0</sub> No <sub>1</sub> Yes

9a. If **Yes**, check all that apply:

- Furosemide Dose: \_\_\_\_\_ mg Given every \_\_\_\_ hour(s) Route: <sub>1</sub> PO (oral)  
<sub>2</sub> IV (intravenous)
- Bumetanide Dose: \_\_\_\_\_ mg Given every \_\_\_\_ hour(s) Route: <sub>1</sub> PO (oral)  
<sub>2</sub> IV (intravenous)
- Chlorothiazide Dose: \_\_\_\_\_ mg Given every \_\_\_\_ hour(s) Route: <sub>1</sub> PO (oral)  
<sub>2</sub> IV (intravenous)
- Hydrochlorothiazide Dose: \_\_\_\_\_ mg Given every \_\_\_\_ hour(s)
- Spironolactone Dose: \_\_\_\_\_ mg Given every \_\_\_\_ hour(s)
- Metolazone Dose: \_\_\_\_\_ mg Given every \_\_\_\_ hour(s)
- Other (record on the Additional Medication Log)

10. Cardiovascular drugs: <sub>0</sub> No <sub>1</sub> Yes

10a. If **Yes**, check all that apply:

- Epinephrine Infusion  Vasopressin
- Dopamine Infusion  Norepinephrine
- Dobutamine Infusion

11. Other Cardio/Respiratory drugs: <sub>0</sub> No <sub>1</sub> Yes

11a. If **Yes**, check all that apply:

- Vitamin A IM or Oral  Other pulmonary vasodilators for treatment  
(for prevention of BPD) of pulmonary hypertension other than Nitric Oxide
- Surfactant  Mucolytic
- Sildenafil  Dornase alfa
- Milrinone

12. Neuro-Muscular Blocking Agent: <sub>0</sub> No <sub>1</sub> Yes

13. Antimicrobial drugs and other agents to prevent infections: <sub>0</sub> No <sub>1</sub> Yes

13a. If **Yes**, check all that apply:

- Antibacterial
- Antifungal



**PREMATURITY AND RESPIRATORY OUTCOMES PROGRAM**

PID: \_\_\_\_\_

**DAILY GROWTH AND NUTRITION / DAILY MEDICATION DATA**

DATE: \_\_\_ / \_\_\_ / \_\_\_\_\_

WEEK \_\_\_ / DAY \_\_\_

- Antiviral
- Palivizumab
- Probiotic

14. Anxiolytic, Anticonvulsant, and Narcotic Analgesic drugs: <sub>0</sub> No <sub>1</sub> Yes

14a. If **Yes**, check all that apply:

- Benzodiazepines
- Phenobarbital
- Phenytoin
- Levetiracetam
- Morphine
- Fentanyl
- Methadone
- Dexmedetomidine

15. Anti-Gastroesophageal Reflux drugs: <sub>0</sub> No <sub>1</sub> Yes

15a. If **Yes**, check all that apply:

- Proton Pump Inhibitors
- H<sub>2</sub> Receptor Antagonists
- Motility agents
- Other

16. Use of blood products and Hematologic Supplements: <sub>0</sub> No <sub>1</sub> Yes

16a. If **Yes**, check all that apply:

- Erythropoietin
- Red Blood Cell Transfusion
- Platelets
- Iron Supplements

17. Oral Vitamins and Electrolyte Supplements: <sub>0</sub> No <sub>1</sub> Yes

17a. If **Yes**, check all that apply:

- Vitamin D
- Vitamin E
- Multivitamin
- Potassium Supplement
- Sodium Supplement



# PREMATURITY AND RESPIRATORY OUTCOMES PROGRAM

PID: \_\_\_\_\_

## DAILY RESPIRATORY DATA

DATE: \_\_\_ / \_\_\_ / \_\_\_\_\_

WEEK \_\_\_ / DAY \_\_\_

1. Did the baby receive any supplemental oxygen today? <sub>0</sub> No <sub>1</sub> Yes

1a. If **Yes**, how long was supplemental oxygen used for? <sub>1</sub> 12 hours or less  
<sub>2</sub> More than 12 hours

1b. What was the concentration of supplemental oxygen at 1200 (Noon) today? \_\_\_\_\_ %

2. Did the baby receive any other respiratory support today? <sub>0</sub> No <sub>1</sub> Yes

If Questions 1 or 2 are **Yes**, answer questions 3 – 6.

3. Was Positive Airway Pressure with Endotracheal Tube used today? <sub>0</sub> No <sub>1</sub> Yes

3a. If **Yes**, select ventilation mode and record the associated values at 1200 (Noon) or closest recorded data to 12 (Noon) if noon data are not available.

Conventional Mechanical Ventilation (CMV):  
Mean Airway Pressure (MAP): \_\_\_\_\_ cmH<sub>2</sub>O  
Positive End Expiratory Pressure (PEEP): \_\_\_\_\_ cmH<sub>2</sub>O

High Frequency Oscillation:  
MAP: \_\_\_\_\_ cmH<sub>2</sub>O

High Frequency Jet Ventilation:  
MAP: \_\_\_\_\_ cmH<sub>2</sub>O

4. Was Respiratory support without Endotracheal Tube used today? <sub>0</sub> No <sub>1</sub> Yes

4a. If **Yes**, select ventilation mode and record the associated values at 1200 (Noon) or closest recorded data to 12 (Noon) if noon data are not available.

Nasal Intermittent Mandatory Ventilation (NIMV):  
MAP: \_\_\_\_\_ cmH<sub>2</sub>O  
PEEP: \_\_\_\_\_ cmH<sub>2</sub>O

Continuous Positive Airway Pressure (CPAP):  
CPAP: \_\_\_\_\_ cmH<sub>2</sub>O

Nasal Cannula with flow rate:  
Nasal Cannula Flow: \_\_\_\_\_ Lpm

5. Was inhaled nitric oxide given today? <sub>0</sub> No <sub>1</sub> Yes

5a. If **Yes**, record the concentration at 1200 (Noon) or closest recorded data to 12 (Noon) if noon data are not available. \_\_\_\_\_ ppm

6. Was the baby reintubated today? <sub>0</sub> No <sub>1</sub> Yes

6a. If **Yes**, indicate the primary reason why the baby was reintubated:

- <sub>1</sub> Increasing respiratory distress
- <sub>2</sub> Stridor
- <sub>3</sub> Apnea and Bradycardia
- <sub>4</sub> Suspected infection
- <sub>5</sub> For diagnostic or therapeutic procedures, including surgery
- <sub>6</sub> Unplanned extubation(s), indicate the number of occurrences this day: \_\_\_\_\_
- <sub>98</sub> Other, specify: \_\_\_\_\_

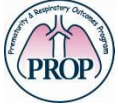

**PREMATURITY AND RESPIRATORY OUTCOMES PROGRAM**

PID: \_\_\_\_\_

**SPECIMEN COLLECTION FORM**

DATE: \_\_\_/\_\_\_/\_\_\_

1. Collection Date \_\_\_\_\_/\_\_\_\_\_/\_\_\_\_\_ [mm/dd/yyyy]

2. Collection Time (if applicable) \_\_\_\_\_ [24 hour clock]

3. Type of Specimen
- <sub>1</sub> Infant Tracheal Aspirate
  - <sub>2</sub> Infant Urine
  - <sub>3</sub> Infant Saliva for DNA
  - <sub>4</sub> Mother Saliva for DNA
  - <sub>5</sub> Father Saliva for DNA

4. Laboratory Accession Number (from TA or UR vial label)

|  |        |             |          |
|--|--------|-------------|----------|
|  | Site # | Sample Type | Sample # |
|--|--------|-------------|----------|

4a. Enter Tracheal Aspirate **CL** Lab Accession Number

|  |        |             |          |
|--|--------|-------------|----------|
|  | Site # | Sample Type | Sample # |
|--|--------|-------------|----------|

5. Number of Aliquots (for Tracheal Aspirate Supernatant or Urine) \_\_\_\_\_

5a. Date Tracheal Aspirate or Urine Specimen Frozen \_\_\_\_\_/\_\_\_\_\_/\_\_\_\_\_ [mm/dd/yyyy]

5b. Time Tracheal Aspirate or Urine Specimen Frozen: \_\_\_\_\_ [24 hour clock]

6. Date sample shipped to Core Lab: \_\_\_\_\_/\_\_\_\_\_/\_\_\_\_\_ [mm/dd/yyyy]

\*Sample Type

|    |                                                                        |
|----|------------------------------------------------------------------------|
| TA | Tracheal Aspirate Supernatant; send to UCSF Tracheal Aspirate Core Lab |
| CL | Tracheal Aspirate Cell Pellet; send to UCSF Tracheal Aspirate Core Lab |
| UR | Urine; send to Vanderbilt Urine Core Lab                               |
| DN | DNA (Saliva); send to Vanderbilt DNA Core Lab.                         |
