# Supplementary material for: Prematurity and respiratory outcomes program (PROP): study protocol of a prospective multicenter study of respiratory outcomes of preterm infants in the United States
Source: PubMed Central journal article supplement (PMC4407843; doi:10.1186/s12887-015-0346-3), 2015-04-10
Supplement: 12887_2015_346_MOESM4_ESM.pdf [file 12887_2015_346_MOESM4_ESM.pdf]

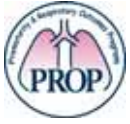

PREMATURITY AND RESPIRATORY OUTCOMES PROGRAM

PID: \_\_\_\_\_

COMORBIDITIES OF PREMATURITY

DATE: \_\_\_/\_\_\_/\_\_\_\_\_

AT WEEK 36, WEEK 40 PMA OR DISCHARGE,
WHICHEVER OCCURS FIRST

Cardio-Pulmonary

1. Did the baby have any of the following types of air leaks? [ ]0 No [ ]1 Yes

If Yes, indicate the type(s) of air leak by answering Questions 1a-1d:

1a. Pneumothorax: [ ]0 No [ ]1 Yes

If Yes, complete 1a1 and 1a2

1a1. Was a chest tube placed? [ ]0 No [ ]1 Yes

1a2. Has there been evidence of a bronchopleural fistula? [ ]0 No [ ]1 Yes

1b. Pulmonary Interstitial Emphysema (PIE): [ ]0 No [ ]1 Yes

1c. Pneumomediastinum: [ ]0 No [ ]1 Yes

1d. Pneumopericardium: [ ]0 No [ ]1 Yes

2. Did the baby have any pulmonary hemorrhages? [ ]0 No [ ]1 Yes

If Yes, complete 2a and 2b.

2a. Did these hemorrhages require transfusion of blood products? [ ]0 No [ ]1 Yes

2b. Did these hemorrhages require increased concentrations of supplemental oxygen and / or ventilator support? [ ]0 No [ ]1 Yes

3. Did the baby have a clinical diagnosis of Patent Ductus Arteriosus (PDA)? [ ]0 No [ ]1 Yes

3a. Was the PDA confirmed by echocardiogram? [ ]0 No [ ]1 Yes

Indicate if any of the following treatments were used to treat the suspected or confirmed PDA:

3b. Indomethacin (do not report any prophylactic Indomethacin given within the first 24 hours of life): [ ]0 No [ ]1 Yes

If Yes, indicate the first date of each distinct course of Indomethacin:

Month / Day / Year
First Course

Month / Day / Year
Second Course

Month / Day / Year
Third Course

3c. Ibuprofen: [ ]0 No [ ]1 Yes

If Yes, indicate the first date of each distinct course of Ibuprofen:

Month / Day / Year
First Course

Month / Day / Year
Second Course

Month / Day / Year
Third Course



PREMATURITY AND RESPIRATORY OUTCOMES PROGRAM

PID: \_\_\_\_\_

COMORBIDITIES OF PREMATURITY

DATE: \_\_\_/\_\_\_/\_\_\_\_\_

AT WEEK 36, WEEK 40 PMA OR DISCHARGE, WHICHEVER OCCURS FIRST

3d. Surgical Ligation:

No  Yes

If Yes, date of surgery:

\_\_\_\_\_/\_\_\_\_\_/\_\_\_\_\_

4. Was a diagnosis of pulmonary hypertension made by a pediatric cardiologist?

No  Yes

4a. If Yes, was this diagnosis based on (Check all that apply)

Echocardiogram

\_\_\_\_\_/\_\_\_\_\_/\_\_\_\_\_  
Month / Day / Year  
Date of Diagnosis

Cardiac catheterization

\_\_\_\_\_/\_\_\_\_\_/\_\_\_\_\_  
Month / Day / Year  
Date of Diagnosis

5. Was airway endoscopy performed by an ENT surgeon or pediatric pulmonologist?

No  Yes

5a. If Yes, indicate clinical findings (check all that apply):

No abnormality noted

Tracheomalacia

\_\_\_\_\_/\_\_\_\_\_/\_\_\_\_\_  
Month / Day / Year  
1st Procedure

\_\_\_\_\_/\_\_\_\_\_/\_\_\_\_\_  
Month / Day / Year  
2nd Procedure

Laryngomalacia

\_\_\_\_\_/\_\_\_\_\_/\_\_\_\_\_  
Month / Day / Year  
1st Procedure

\_\_\_\_\_/\_\_\_\_\_/\_\_\_\_\_  
Month / Day / Year  
2nd Procedure

Subglottic stenosis

\_\_\_\_\_/\_\_\_\_\_/\_\_\_\_\_  
Month / Day / Year  
1st Procedure

\_\_\_\_\_/\_\_\_\_\_/\_\_\_\_\_  
Month / Day / Year  
2nd Procedure

Vocal cord paralysis (unilateral)

\_\_\_\_\_/\_\_\_\_\_/\_\_\_\_\_  
Month / Day / Year  
1st Procedure

\_\_\_\_\_/\_\_\_\_\_/\_\_\_\_\_  
Month / Day / Year  
2nd Procedure

Vocal cord paralysis (bilateral)

\_\_\_\_\_/\_\_\_\_\_/\_\_\_\_\_  
Month / Day / Year  
1st Procedure

\_\_\_\_\_/\_\_\_\_\_/\_\_\_\_\_  
Month / Day / Year  
2nd Procedure

Other, specify:

\_\_\_\_\_

\_\_\_\_\_/\_\_\_\_\_/\_\_\_\_\_  
Month / Day / Year  
1st Procedure

\_\_\_\_\_/\_\_\_\_\_/\_\_\_\_\_  
Month / Day / Year  
2nd Procedure

6. Did the baby have a tracheotomy?

No  Yes

6a. If Yes, indicate the procedure date:

\_\_\_\_\_/\_\_\_\_\_/\_\_\_\_\_



COMORBIDITIES OF PREMATURITY

AT WEEK 36, WEEK 40 PMA OR DISCHARGE,  
WHICHEVER OCCURS FIRST

7. Was Ventilator-Associated Pneumonia (VAP) suspected in this baby? <sub>0</sub> No <sub>1</sub> Yes

If **Yes** to 7, answer 7a – 7c.

7a. Did the baby have worsening gas exchange (e.g. O<sub>2</sub> desaturations, Increased oxygen requirements, or increased ventilator demand)? <sub>0</sub> No <sub>1</sub> Yes

7b. Did the baby have any of the following associated conditions (check all that apply)?

- Temperature instability with no other recognized cause
- Leukopenia (<4,000 WBC/mm<sup>3</sup>)
- Leukocytosis (≥ 15,000 WBC/mm<sup>3</sup>) and left shift (≥ 10% band forms)
- New onset of purulent sputum
- Change in character of sputum
- Increased respiratory secretions
- Increased suctioning requirements
- Apnea
- Tachypnea
- Nasal flaring with retraction of chest wall or grunting
- Wheezing
- Rales
- Rhonchi
- Cough
- Bradycardia (< 100 beats per minute)
- Tachycardia (> 170 beats per minute)
- None of the above

7c. Did the baby have serial chest radiographs with any of the following (check all that apply)?

- New infiltrate
- Progressive and persistent infiltrate
- Consolidation
- Cavitation
- Pneumatoceles
- None of the above

Infection

8. Did the baby have any blood culture-proven Sepsis? <sub>0</sub> No <sub>1</sub> Yes

8a. If **Yes**, indicate the type(s) of Sepsis:

- Bacterial                      Number of distinct episodes: \_\_\_\_
- Fungal                              Number of distinct episodes: \_\_\_\_
- Viral                                Number of distinct episodes: \_\_\_\_

8b. Presumed, but not culture-proven Sepsis? <sub>0</sub> No <sub>1</sub> Yes

If **Yes**, number of distinct episodes: \_\_\_\_

9. Did the baby have any culture-proven Meningitis? <sub>0</sub> No <sub>1</sub> Yes

9a. If **Yes**, indicate the type(s) of Meningitis:

- Bacterial                      Number of distinct episodes: \_\_\_\_
- Fungal                              Number of distinct episodes: \_\_\_\_
- Viral                                Number of distinct episodes: \_\_\_\_

9b. Presumed, but not culture-proven Meningitis? <sub>0</sub> No <sub>1</sub> Yes

If **Yes**, number of distinct episodes: \_\_\_\_



PREMATURITY AND RESPIRATORY OUTCOMES PROGRAM

PID: \_\_\_\_\_

COMORBIDITIES OF PREMATURITY

DATE: \_\_\_/\_\_\_/\_\_\_\_\_

AT WEEK 36, WEEK 40 PMA OR DISCHARGE,  
WHICHEVER OCCURS FIRST

10. Did the baby have upper respiratory tract infection of confirmed viral etiology?

No  Yes

10a. If **Yes**, indicate the confirmed viral etiologies (check all that apply):

Influenza  
Month / Day / Year  
1st Diagnosis

Month / Day / Year  
2nd Diagnosis

Para-influenza  
Month / Day / Year  
1st Diagnosis

Month / Day / Year  
2nd Diagnosis

Rhinovirus  
Month / Day / Year  
1st Diagnosis

Month / Day / Year  
2nd Diagnosis

Respiratory syncytial virus (RSV)  
Month / Day / Year  
1st Diagnosis

Month / Day / Year  
2nd Diagnosis

Other, specify  
\_\_\_\_\_  
Month / Day / Year  
1st Diagnosis

Month / Day / Year  
2nd Diagnosis

11. Did the baby have any other infections?

No  Yes

11a. If **Yes**, indicate the infections (check all that apply):

Urinary tract infection  
Month / Day / Year  
1st Diagnosis

Month / Day / Year  
2nd Diagnosis

Cellulitis  
Month / Day / Year  
1st Diagnosis

Month / Day / Year  
2nd Diagnosis

Osteomyelitis  
Month / Day / Year  
1st Diagnosis

Month / Day / Year  
2nd Diagnosis

Cytomegalovirus (CMV)  
Month / Day / Year  
1st Diagnosis

Month / Day / Year  
2nd Diagnosis

Surgical wound infection  
Month / Day / Year  
1st Diagnosis

Month / Day / Year  
2nd Diagnosis

Other, specify  
\_\_\_\_\_  
Month / Day / Year  
1st Diagnosis

Month / Day / Year  
2nd Diagnosis



PREMATURITY AND RESPIRATORY OUTCOMES PROGRAM

PID: \_\_\_\_\_

COMORBIDITIES OF PREMATURITY

DATE: \_\_\_/\_\_\_/\_\_\_\_\_

AT WEEK 36, WEEK 40 PMA OR DISCHARGE,
WHICHEVER OCCURS FIRST

Gastro Intestinal

12. Did the baby have Necrotizing Enterocolitis (NEC) Bell stage 2 or 3?

[ ]0 No [ ]1 Yes

12a. If Yes, date of first medical diagnosis:

Month / Day / Year

12b. Were there any bowel perforations?

[ ]0 No [ ]1 Yes

12c. Did the baby have surgery for NEC?

[ ]0 No [ ]1 Yes

If Yes, indicate the surgical procedure(s) performed (check all that apply) and provide the date(s) of surgery:

[ ] Peritoneal drain

Month / Day / Year
1st Surgery

Month / Day / Year
2nd Surgery

[ ] Laparotomy

Month / Day / Year
1st Surgery

Month / Day / Year
2nd Surgery

[ ] Bowel resection

Month / Day / Year
1st Surgery

Month / Day / Year
2nd Surgery

[ ] Repair of Adhesion /
Strictures

Month / Day / Year
1st Surgery

Month / Day / Year
2nd Surgery

13. Did the baby have any Isolated Bowel Perforations not considered to be associated with NEC?

[ ]0 No [ ]1 Yes

13a. If Yes, date of first medical diagnosis:

Month / Day / Year

13b. Did the baby receive any surgery for Isolated Bowel Perforations not considered to be associated with NEC?

[ ]0 No [ ]1 Yes

If Yes, indicate the surgical procedure(s) performed (check all that apply) and provide the date(s) of surgery:

[ ] Peritoneal drain

Month / Day / Year
1st Surgery

Month / Day / Year
2nd Surgery

[ ] Laparotomy

Month / Day / Year
1st Surgery

Month / Day / Year
2nd Surgery

Ophthalmologic

14. Were any Retinopathy of Prematurity (ROP) examinations performed prior to discharge from the PROP study center?

[ ]0 No [ ]1 Yes

15. Was this baby diagnosed with ROP?

[ ]0 No [ ]1 Yes



**PREMATURITY AND RESPIRATORY OUTCOMES PROGRAM**

PID: \_\_\_\_\_

**COMORBIDITIES OF PREMATURITY**

DATE: \_\_\_/\_\_\_/\_\_\_\_\_

*AT WEEK 36, WEEK 40 PMA OR DISCHARGE,  
WHICHEVER OCCURS FIRST*

If **Yes**, answer the following questions:

15a. What was the worst stage ever reported in any zone?

\_\_\_ Left Eye (1-5)  
\_\_\_ Right Eye (1-5)

15b. Did the baby undergo laser or cryo-surgery?

Left Eye:            <sub>0</sub> No            <sub>1</sub> Yes

Date of procedure:    \_\_\_/\_\_\_/\_\_\_  
Month    Day    Year

Right Eye:           <sub>0</sub> No            <sub>1</sub> Yes

Date of procedure:    \_\_\_/\_\_\_/\_\_\_  
Month    Day    Year

15c. Did the baby undergo Bevacizumab (Avastin) treatment?

Left Eye:            <sub>0</sub> No            <sub>1</sub> Yes

Date of procedure:    \_\_\_/\_\_\_/\_\_\_  
Month    Day    Year

Right Eye:           <sub>0</sub> No            <sub>1</sub> Yes

Date of procedure:    \_\_\_/\_\_\_/\_\_\_  
Month    Day    Year

15d. Did the baby undergo vitrectomy?

Left Eye:            <sub>0</sub> No            <sub>1</sub> Yes

Date of procedure:    \_\_\_/\_\_\_/\_\_\_  
Month    Day    Year

Right Eye:           <sub>0</sub> No            <sub>1</sub> Yes

Date of procedure:    \_\_\_/\_\_\_/\_\_\_  
Month    Day    Year

Neurologic

16. Did the baby receive a ventricular shunt?

<sub>0</sub> No            <sub>1</sub> Yes

16a. If **Yes**, provide the date of first shunt placement:

\_\_\_/\_\_\_/\_\_\_  
Month    Day    Year

Other Surgeries (excluding PDA ligation, surgery for NEC or Bowel Perforation, all surgeries for ROP, ventriculoperitoneal shunt placement, and tracheotomy)

1. Type of surgery: \_\_\_\_\_

Date of surgery:    \_\_\_/\_\_\_/\_\_\_  
Month    Day    Year

2. Type of surgery: \_\_\_\_\_

Date of surgery:    \_\_\_/\_\_\_/\_\_\_  
Month    Day    Year

3. Type of surgery: \_\_\_\_\_

Date of surgery:    \_\_\_/\_\_\_/\_\_\_  
Month    Day    Year

4. Type of surgery: \_\_\_\_\_

Date of surgery:    \_\_\_/\_\_\_/\_\_\_  
Month    Day    Year

5. Type of surgery: \_\_\_\_\_

Date of surgery:    \_\_\_/\_\_\_/\_\_\_  
Month    Day    Year

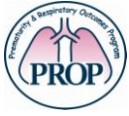

PREMATURITY AND RESPIRATORY OUTCOMES PROGRAM

PID: \_\_\_\_\_

DISCHARGE FORM

DATE: \_\_\_ / \_\_\_ / \_\_\_\_\_

1. What was the baby's discharge date?

Month \_\_\_ / Day \_\_\_ / Year \_\_\_\_\_

2. Where was the baby discharged to?

- <sub>1</sub> Home
- <sub>2</sub> Transfer to another hospital
- <sub>3</sub> Baby died at study center\*
- <sub>98</sub> Other, specify: \_\_\_\_\_

**NOTE:** If the child dies at the study center, record date of discharge as date of death and complete a Death Form. All remaining information on this form should reflect information collected up to the time of death.

3. Was this baby enrolled in TOLSURF?

<sub>0</sub> No <sub>1</sub> Yes

3a. If **Yes**, provide study specific Participant ID \_\_\_\_\_

4. Was this baby enrolled in the NRN Hydrocortisone for Extubation Trial?

<sub>0</sub> No <sub>1</sub> Yes

4a. If **Yes**, provide study specific Participant ID \_\_\_\_\_

5. Was this baby enrolled in the NRN Generic database?

<sub>0</sub> No <sub>1</sub> Yes

5a. If **Yes**, provide study specific Participant ID \_\_\_\_\_

6. Was this baby enrolled in any other randomized clinical treatment trials?

<sub>0</sub> No <sub>1</sub> Yes

6a. If **Yes**, provide clinical trial name(s): \_\_\_\_\_

7. Was this baby enrolled in any other long term follow-up studies?

<sub>0</sub> No <sub>1</sub> Yes

7a. If **Yes**, provide study name(s): \_\_\_\_\_

8. How many people normally live in your home including your baby (for at least 6 months of the year)? (Please select one)

- <sub>1</sub> 2-3
- <sub>2</sub> 4-6
- <sub>3</sub> 7-10
- <sub>4</sub> >10

8a. How many other children under 5 years old live in <baby's name>'s home?

\_\_\_ children

8b. How many children between ages 5-12 years old live in <baby's name>'s home?

\_\_\_ children

9. Is baby exposed to dogs, cats, or other furry animals at home?

<sub>0</sub> No <sub>1</sub> Yes



PREMATURITY AND RESPIRATORY OUTCOMES PROGRAM

PID: \_\_\_\_\_

DISCHARGE FORM

DATE: \_\_\_ / \_\_\_ / \_\_\_\_\_

10. Will your baby receive any care outside of the home in the next year? \_0 No \_1 Yes \_88 Unknown

11. Which one of the following three statements best describes smoking in <baby's name>'s home?

- \_1 Smoking is allowed anywhere in the home
- \_2 Smoking is limited to part of the house where <baby's name> rarely goes
- \_3 Smoking is not allowed inside the home at all

12. Which one of the following five statements best describes smoking in the car?

- \_0 Child rarely travels by car.
- \_1 There is no smoking inside the car
- \_2 Smoking occurs in the car only when <baby's name> is not inside
- \_3 Smoking is sometimes allowed in the car
- \_4 Smoking is usually or always allowed in the car

13. Please tell us what breathing and allergy problems run in the family (Check all that apply)

| Symptoms                            | None/ Not applicable        | Biological Siblings (any)   | Biological Parents (one or both) |
|-------------------------------------|-----------------------------|-----------------------------|----------------------------------|
| a. Asthma/Recurrent lung infections | <input type="checkbox"/> _0 | <input type="checkbox"/> _1 | <input type="checkbox"/> _2      |
| b. Allergies/Hayfever               | <input type="checkbox"/> _0 | <input type="checkbox"/> _1 | <input type="checkbox"/> _2      |
| c. Eczema                           | <input type="checkbox"/> _0 | <input type="checkbox"/> _1 | <input type="checkbox"/> _2      |

14. How will <baby's name>'s health care be paid for primarily: (select only one)

- \_0 No Insurance (self pay)
- \_1 Private Insurance
- \_2 Medicaid/Public Insurance



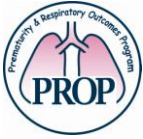

**PREMATURITY AND RESPIRATORY OUTCOMES PROGRAM**

**CONTACT FORM**

ADMINISTRATIVE

PID: \_\_\_\_\_

DATE: \_\_\_\_ / \_\_\_\_ / \_\_\_\_

**\*\*Please Note: This is an Administrative Form. All personal information provided will be held in confidence and will not be entered into the Data Management System Database.\*\***

1. Child's name: \_\_\_\_\_  
First \_\_\_\_\_ Last \_\_\_\_\_
- a. Child's nickname (if any) \_\_\_\_\_
- b. Child's sex  Male  Female
2. Child's birth date: \_\_\_\_\_  
Month / Day / Year
3. Telephone Number: \_\_\_\_\_ - \_\_\_\_\_ - \_\_\_\_\_
4. Address: \_\_\_\_\_  
\_\_\_\_\_  
\_\_\_\_\_

**Primary Contact Information**

5. Name: \_\_\_\_\_  
First \_\_\_\_\_ Last \_\_\_\_\_
6. Telephone Number: \_\_\_\_\_ - \_\_\_\_\_ - \_\_\_\_\_
7. Cell Phone Number: \_\_\_\_\_ - \_\_\_\_\_ - \_\_\_\_\_
8. Address: \_\_\_\_\_  
\_\_\_\_\_  
\_\_\_\_\_
9. Email address: \_\_\_\_\_

**Mother's Contact Information**

10. Is this the Primary Contact?  No (Complete contact information)  Yes (Skip to next section)
11. Name: \_\_\_\_\_  
First \_\_\_\_\_ Last \_\_\_\_\_
12. Telephone Number: \_\_\_\_\_ - \_\_\_\_\_ - \_\_\_\_\_
13. Cell Phone Number: \_\_\_\_\_ - \_\_\_\_\_ - \_\_\_\_\_
14. Address: \_\_\_\_\_  
\_\_\_\_\_  
\_\_\_\_\_
15. Email address: \_\_\_\_\_

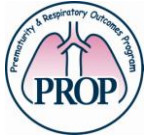

**PREMATURITY AND RESPIRATORY OUTCOMES PROGRAM**

**CONTACT FORM**

*ADMINISTRATIVE*

PID: \_\_\_\_\_

DATE: \_\_\_\_ / \_\_\_\_ / \_\_\_\_

**Spouse/Partner's Contact Information**

16. Is this the Primary Contact?  No (Complete contact information)  Yes (Skip to next section)

17. Name: \_\_\_\_\_  
First Last

18. Telephone Number: \_\_\_\_\_ - \_\_\_\_\_ - \_\_\_\_\_

19. Cell Phone Number: \_\_\_\_\_ - \_\_\_\_\_ - \_\_\_\_\_

20. Address: \_\_\_\_\_  
\_\_\_\_\_  
\_\_\_\_\_

21. Email address: \_\_\_\_\_

**Please provide the name and contact information of someone who is most likely to have your address in case we lose contact with you. It is helpful if this person does not reside with your child.**

22. Name: \_\_\_\_\_  
First Last

23. Telephone Number: \_\_\_\_\_ - \_\_\_\_\_ - \_\_\_\_\_

24. Cell Phone Number: \_\_\_\_\_ - \_\_\_\_\_ - \_\_\_\_\_

25. Address: \_\_\_\_\_  
\_\_\_\_\_  
\_\_\_\_\_

26. Email address: \_\_\_\_\_

**Please provide the name and contact information of an additional person who is most likely to have your address in case we lose contact with you.**

27. Name: \_\_\_\_\_  
First Last

28. Telephone Number: \_\_\_\_\_ - \_\_\_\_\_ - \_\_\_\_\_

29. Cell Phone Number: \_\_\_\_\_ - \_\_\_\_\_ - \_\_\_\_\_

30. Address: \_\_\_\_\_  
\_\_\_\_\_  
\_\_\_\_\_

31. Email address: \_\_\_\_\_



**PREMATURITY AND RESPIRATORY OUTCOMES PROGRAM**

**CONTACT FORM**

*ADMINISTRATIVE*

PID: \_\_\_\_\_

DATE: \_\_\_\_ / \_\_\_\_ / \_\_\_\_

---

**Pediatrician Contact Information**

32. Name: \_\_\_\_\_  
First \_\_\_\_\_ Last \_\_\_\_\_

33. Telephone Number: \_\_\_\_\_ - \_\_\_\_\_ - \_\_\_\_\_

34. Cell Phone Number: \_\_\_\_\_ - \_\_\_\_\_ - \_\_\_\_\_

35. Address: \_\_\_\_\_  
\_\_\_\_\_  
\_\_\_\_\_

36. Email address: \_\_\_\_\_

---

**Other Health Professional's Contact Information**

37. Name: \_\_\_\_\_  
First \_\_\_\_\_ Last \_\_\_\_\_

38. Telephone Number: \_\_\_\_\_ - \_\_\_\_\_ - \_\_\_\_\_

39. Cell Phone Number: \_\_\_\_\_ - \_\_\_\_\_ - \_\_\_\_\_

40. Address: \_\_\_\_\_  
\_\_\_\_\_  
\_\_\_\_\_

41. Email address: \_\_\_\_\_
