# Supplementary material for: Prematurity and respiratory outcomes program (PROP): study protocol of a prospective multicenter study of respiratory outcomes of preterm infants in the United States
Source: PubMed Central journal article supplement (PMC4407843; doi:10.1186/s12887-015-0346-3), 2015-04-10
Supplement: 12887_2015_346_MOESM5_ESM.pdf [file 12887_2015_346_MOESM5_ESM.pdf]

**\*\* Please Note: All efforts should be made to conduct the interview with the child's primary caregiver or the individual who is able to provide information about the child's health since the <last contact>. \*\***

1. Was this interview conducted?

- \_0 No (Skip to 1c)
- \_1 Yes (Continue with 1a)

If Yes, answer questions 1a and 1b.

a. Visit month

- \_1 Month 3                      \_2 Month 6
- \_3 Month 9                      \_4 Month 12

b. Date of Interview:

\_\_\_\_ / \_\_\_\_ / \_\_\_\_  
Month    Day    Year

c. If no, indicate reason why interview was not conducted (Please select only one)

- \_1 Unable to contact
- \_2 Refused interview
- \_3 Child died (Please complete Record of Death form)
- \_98 Other, specify \_\_\_\_\_

2. Initials of person completing this form

\_\_\_\_\_

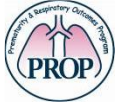

1. Please indicate how interview was conducted.

- <sub>1</sub> Over the phone
- <sub>2</sub> In person
- <sub>3</sub> In hospital

**Section I: Hospitalizations and Urgent Care Visits**

Since our <last contact> with you about <baby's name>...

2. How many times has <baby's name> been admitted to a hospital for one or more nights in a row outside of the Emergency Room?

\_\_\_ times <sub>88</sub> Don't Know

a. How many times were because of wheezing, breathing problems or a change in his/her breathing?

\_\_\_ times <sub>88</sub> Don't Know

b. Did any of these times require admission to an intensive care unit (NICU, PICU, or Critical Care Unit)?

<sub>0</sub> No <sub>1</sub> Yes <sub>88</sub> Don't Know

c. Were any of the admissions due to Respiratory Syncytial Virus (RSV)?

<sub>0</sub> No <sub>1</sub> Yes <sub>88</sub> Don't Know

3. How many times has <baby's name> had a sick visit to a doctor's office, clinic or Emergency Room?

\_\_\_ times <sub>88</sub> Don't Know

a. How many times were because of wheezing, breathing problems or a change in his/her breathing?

\_\_\_ times <sub>88</sub> Don't Know

**Section II: Breathing, Wheezing, and Coughing Assessment**

4. Has <baby's name>'s chest sounded wheezy or whistling?

<sub>0</sub> No <sub>1</sub> Yes <sub>88</sub> Don't Know

If Yes, answer questions a-d.

a. Has this occurred with colds?

<sub>0</sub> No <sub>1</sub> Yes <sub>88</sub> Don't Know

b. Has <baby's name>'s chest sounded wheezy or whistling apart from colds?

<sub>0</sub> No <sub>1</sub> Yes <sub>88</sub> Don't Know

c. How often has <baby's name>'s chest sounded wheezy during the day time?

- <sub>0</sub> Less than once per week
- <sub>1</sub> 1-2 times per week
- <sub>2</sub> 3-6 times per week
- <sub>3</sub> Daily, but not all the time
- <sub>4</sub> Daily, all the time

d. How often has <baby's name>'s chest sounded wheezy during the night time?

- <sub>0</sub> Less than once per week
- <sub>1</sub> 1-2 times per week
- <sub>2</sub> 3-6 times per week
- <sub>3</sub> Daily, but not all the time
- <sub>4</sub> Daily, all the time

5. Since our <last contact> has <baby's name> been diagnosed with wheezing by a doctor?

<sub>0</sub> No <sub>1</sub> Yes <sub>88</sub> Don't Know



Since our <last contact> with you about <baby's name>...

6. Has <baby's name> had a cough without a cold? <sub>0</sub> No <sub>1</sub> Yes <sub>88</sub> Don't Know

If Yes, answer questions a-b.

a. How often has <baby's name> had coughing during the day time? <sub>0</sub> Less than once per week  
<sub>1</sub> 1-2 times per week  
<sub>2</sub> 3-6 times per week  
<sub>3</sub> Daily, but not all the time  
<sub>4</sub> Daily, all the time

b. How often has <baby's name> had coughing during the night time? <sub>0</sub> Less than once per week  
<sub>1</sub> 1-2 times per week  
<sub>2</sub> 3-6 times per week  
<sub>3</sub> Daily, but not all the time  
<sub>4</sub> Daily, all the time

Since our <last contact> with you about <baby's name>...

7. How many head colds (common colds) has <baby's name> had? <sub>0</sub> 0  
<sub>1</sub> 1  
<sub>2</sub> 2  
<sub>3</sub> 3  
<sub>4</sub> 4 or more

**Section III: Respiratory Medications**

[Please ask parent to collect all medications that the baby is currently using or has used since [discharge or the last contact] and identify them by reading the medication label or package. Record the medication name (generic or brand name) in the Respiratory Medication worksheet. There is no need to record dose, unit, frequency or route of administration. Use the Respiratory Medication worksheet as a guide to determine which medications should be recorded in the database.

Please complete the Follow Up Medication Log (MEDLOG) in the database. ]

**Section IV: Home Technology Dependence**

8. Since our <last contact> has <baby's name> used any medical equipment or any of the following in the home?

|                                     |                                          |                                           |
|-------------------------------------|------------------------------------------|-------------------------------------------|
| a. Breathing and Heart Rate monitor | <input type="checkbox"/> <sub>0</sub> No | <input type="checkbox"/> <sub>1</sub> Yes |
| b. Oxygen therapy                   | <input type="checkbox"/> <sub>0</sub> No | <input type="checkbox"/> <sub>1</sub> Yes |
| c. CPAP or BIPAP                    | <input type="checkbox"/> <sub>0</sub> No | <input type="checkbox"/> <sub>1</sub> Yes |
| d. Ventilator                       | <input type="checkbox"/> <sub>0</sub> No | <input type="checkbox"/> <sub>1</sub> Yes |
| e. Trach or breathing tube          | <input type="checkbox"/> <sub>0</sub> No | <input type="checkbox"/> <sub>1</sub> Yes |
| f. Feeding Tube in nose             | <input type="checkbox"/> <sub>0</sub> No | <input type="checkbox"/> <sub>1</sub> Yes |
| g. Feeding Tube in stomach          | <input type="checkbox"/> <sub>0</sub> No | <input type="checkbox"/> <sub>1</sub> Yes |
| h. Other _____                      | <input type="checkbox"/> <sub>0</sub> No | <input type="checkbox"/> <sub>1</sub> Yes |

**NOTE – The Month 3 and Month 9 questionnaires end here. Complete the entire form at Months 6 and 12.**



**Section V: Nutrition**

9. Since our <last contact>, did <baby's name> receive mother's breast milk, either at breast, from a bottle or through a tube? <sub>0</sub> No <sub>1</sub> Yes <sub>88</sub> Don't Know
- a. If Yes, for how many months did <baby's name> receive any breast milk for more than half of the feedings?

- <sub>0</sub> Less than 1  
<sub>1</sub> 1  
<sub>2</sub> 2  
<sub>3</sub> 3

**Section VI: Exposure to Tobacco products and Respiratory Irritants**

10. How often has the mother or primary caregiver smoked in the in the last 6 months?

- <sub>0</sub> Never  
<sub>1</sub> Monthly  
<sub>2</sub> Weekly  
<sub>3</sub> Daily

11. How many people who live in <baby's name>'s home smoke? \_\_\_\_\_ people

12. Which one of the following three statements best describes smoking in <baby's name>'s home?

- <sub>1</sub> Smoking is allowed anywhere in the home  
<sub>2</sub> Smoking is limited to part of the house where <baby's name> rarely goes  
<sub>3</sub> Smoking is not allowed inside the home at all

13. Which one of the following five statements best describes smoking in the car?

- <sub>0</sub> Child rarely travels by car  
<sub>1</sub> There is no smoking inside the car  
<sub>2</sub> Smoking occurs in the car only when <baby's name> is not inside  
<sub>3</sub> Smoking is sometimes allowed in the car  
<sub>4</sub> Smoking is usually or always allowed in the car

14. a. How many other children under 5 years old live in <baby's name>'s home? \_\_\_\_\_ children

- b. How many children between ages 5-12 years old live in <baby's name>'s home? \_\_\_\_\_ children

**Please indicate if <baby's name> is exposed to the following at HOME**

15. Smoke from cigarettes or other tobacco products?  
 a. If yes, how often is it used?

- <sub>0</sub> No <sub>1</sub> Yes  
<sub>1</sub> Daily  
<sub>2</sub> Weekly  
<sub>3</sub> Monthly

16. Kerosene heater, wood burning stove, or fireplace  
 a. If yes, how often is it used?

- <sub>0</sub> No <sub>1</sub> Yes  
<sub>1</sub> Daily  
<sub>2</sub> Weekly  
<sub>3</sub> Monthly

17. Dogs, cats, and other furry animals  
 a. If yes, how many pets? \_\_\_\_\_ pets

- <sub>0</sub> No <sub>1</sub> Yes



18. Does your child receive regular care (at least once a week) outside the home? <sub>0</sub> No <sub>1</sub> Yes
- a. If Yes, are there children that are not siblings also present at the outside care site? <sub>0</sub> No <sub>1</sub> Yes

**If response to Question 18 is Yes and <baby's name> attends DAY CARE, please answer questions 19-21, if not, please skip to question 22. Please indicate if <baby's name> is exposed to the following at DAY CARE**

19. Smoke from cigarettes or other tobacco products? <sub>0</sub> No <sub>1</sub> Yes <sub>99</sub> N/A
- a. If yes, how often is it used? <sub>1</sub> Daily <sub>2</sub> Weekly <sub>3</sub> Monthly
20. Kerosene heater, wood burning stove, or fireplace <sub>0</sub> No <sub>1</sub> Yes <sub>99</sub> N/A
- a. If yes, how often is it used? <sub>1</sub> Daily <sub>2</sub> Weekly <sub>3</sub> Monthly
21. Dogs, cats, and other furry animals <sub>0</sub> No <sub>1</sub> Yes <sub>99</sub> N/A
- a. If yes, how many pets? \_\_\_\_\_ pets

**If response to Question 18 is Yes and <baby's name> goes to the HOME of a Babysitter or Other Regular Caregiver, please answer questions 22-24, if not, please skip to question 25.**

**Please indicate if <baby's name> is exposed to the following at the HOME of BABYSITTER or Other REGULAR CAREGIVER**

22. Smoke from cigarettes or other tobacco products? <sub>0</sub> No <sub>1</sub> Yes <sub>99</sub> N/A
- a. If yes, how often is it used? <sub>1</sub> Daily <sub>2</sub> Weekly <sub>3</sub> Monthly
23. Kerosene heater, wood burning stove, or fireplace <sub>0</sub> No <sub>1</sub> Yes <sub>99</sub> N/A
- a. If yes, how often is it used? <sub>1</sub> Daily <sub>2</sub> Weekly <sub>3</sub> Monthly
24. Dogs, cats, and other furry animals <sub>0</sub> No <sub>1</sub> Yes <sub>99</sub> N/A
- a. If yes, how many pets? \_\_\_\_\_ pets



**Section VII: Respiratory Treatments**

25. Has <baby's name> had regular shots to prevent Respiratory Syncytial Virus (RSV)? <sub>0</sub> No <sub>1</sub> Yes <sub>88</sub> Don't Know
26. Has <baby's name> had a flu shot? <sub>0</sub> No <sub>1</sub> Yes <sub>88</sub> Don't Know  
<sub>99</sub> N/A (for children < 6 months chronological age)
27. Are <baby's name>'s immunizations up to date?  
a. If not, why not? <sub>0</sub> No <sub>1</sub> Yes <sub>88</sub> Don't Know  
 Illness  
 Refused  
 Other
28. How much does <baby's name>'s health and healthcare needs disrupt your own lifestyle or other planned activities?  
(For example: ability to attend work or school) <sub>0</sub> Not at all  
<sub>1</sub> Infrequently  
<sub>2</sub> Half the time  
<sub>3</sub> Frequently  
<sub>4</sub> All of the time

**Section VIII: Infant Gastroesophageal Reflux Questionnaire (I-GERQ-R)**

Please complete the Gastroesophageal Reflux Questionnaire

**Section IX: Atopy and Allergy Assessment (Completed at Month 12 ONLY)**

29. Has <baby's name> had a new diagnosis of asthma or reactive airways disease diagnosed by a doctor? <sub>0</sub> No <sub>1</sub> Yes <sub>88</sub> Don't Know
30. Has <baby's name> had a runny, stuffy, or itchy nose, or watery eyes apart from a cold? <sub>0</sub> No <sub>1</sub> Yes <sub>88</sub> Don't Know
31. Has <baby's name> ever been allergic to any food? <sub>0</sub> No <sub>1</sub> Yes <sub>88</sub> Don't Know
32. Has <baby's name> been diagnosed with eczema (allergic skin rash)? <sub>0</sub> No <sub>1</sub> Yes <sub>88</sub> Don't Know

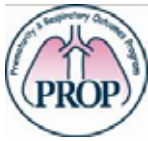

1. During the past week, how often did the baby spit-up (anything coming out of the mouth) during a 24-hour period?  
 Less than once  
 1 to 3 times  
 4 to 6 times  
 More than 6 times
  
2. During the past week, how much did the baby spit-up (anything coming out of the mouth) during a typical episode?  
 Did not spit up  
 Less than 1 tablespoonful  
 1 tablespoonful to 2 ounces  
 More than 2 ounces to half the feeding  
 More than half the feeding
  
3. During the past week, how often did spitting up (anything coming out of the mouth) seem to be uncomfortable for the baby, for example, crying, fussing, irritability, etc.?  
 Never  
 Rarely  
 Sometimes  
 Often  
 Always
  
4. During the past week, how often did the baby refuse a feeding even when hungry?  
 Never  
 Rarely  
 Sometimes  
 Often  
 Always
  
5. During the past week, how often did the baby stop eating soon after starting even when hungry?  
 Never  
 Rarely  
 Sometimes  
 Often  
 Always
  
6. During the past week, did the baby cry a lot during or within 1 hour after feedings?  
 Never  
 Rarely  
 Sometimes  
 Often  
 Always
  
7. During the past week, did the baby cry or fuss more than usual?  
 Never  
 Rarely  
 Sometimes  
 Often  
 Always



**PREMATURITY AND RESPIRATORY OUTCOMES PROGRAM**

PID: \_\_\_\_\_

**INFANT GASTROESOPHAGEAL REFLUX QUESTIONNAIRE  
(I-GERQ)<sup>1</sup>**

DATE: \_\_\_ / \_\_\_ / \_\_\_\_\_

8. During the past week, on average how long did the baby cry or fuss during a 24 hour period?
- Less than 10 minutes  
 10 minutes to 1 hour  
 More than 1 hour but less than 3 hours  
 3 or more hours
9. During the past week, how often did the baby have hiccups?
- Never  
 Rarely  
 Sometimes  
 Often  
 Always
10. During the past week, how often did the baby have episodes of arching back?
- Never  
 Rarely  
 Sometimes  
 Often  
 Always
11. During the past week, has the baby stopped breathing while awake or struggled to breathe?
- No  
 Yes
12. During the past week, has the baby turned blue or purple?
- No  
 Yes

<sup>1</sup> Translated versions of the I-GERQ-R are available on request from Dr. Susan Orenstein at the University of Pittsburgh ([Susan.Orenstein@chp.edu](mailto:Susan.Orenstein@chp.edu))





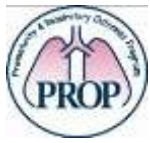**Table 1. Respiratory medications with standardized drug names and codes for DMS**

| Generic Name                    | Commonly used Brand Names                                         | Category                               | Drug Code |
|---------------------------------|-------------------------------------------------------------------|----------------------------------------|-----------|
| Albuterol (Nebulized or MDI)    | Ventolin, Ventolin HFA, Proventil, Proventil HFA, Accuneb, Proair | Inhaled Bronchodilator                 | 2073      |
| Aminophylline                   | Aminophylline                                                     | Methylxanthine                         | 37        |
| Beclomethasone (MDI)            | Beclomethasone Dipropionate, QVAR                                 | Inhaled Steroid                        | 70        |
| Bosentan                        | Bosentan, Tracleer                                                | Pulmonary Vasodilator                  | 22990     |
| Budesonide (Nebulized or MDI)   | Pulmicort                                                         | Inhaled Steroid                        | 6545      |
| Bumetanide                      | Bumex                                                             | Diuretic                               | 3664      |
| Caffeine Citrate                | Caffeine Citrate/ Cafcit Caffeine Solution                        | Methylxanthine                         | 11        |
| Chlorothiazide                  | Diuril                                                            | Diuretic                               | 3646      |
| Ciclesonide (MDI)               | Alvesco                                                           | Inhaled Steroid                        | 32691     |
| Dexamethasone                   | Dexamethasone Intensol, Baycadron                                 | Systemic Corticosteroid                | 2889      |
| Dexamethasone (Nebulized)       | Dexamethasone (Nebulized)                                         | Inhaled Steroid                        | 38645     |
| Epoprostenol Sodium             | Epoprostenol, Flolan                                              | Pulmonary Vasodilator                  | 37760     |
| Flunisolide (MDI)               | Flunisolide, Aerobid                                              | Inhaled Steroid                        | 72        |
| Fluticasone (MDI)               | Fluticasone Propionate, Flovent HFA                               | Inhaled Steroid                        | 7873      |
| Furosemide                      | Lasix                                                             | Diuretic                               | 3660      |
| Hydrochlorothiazide             | Microzide                                                         | Diuretic                               | 3649      |
| Hydrocortisone                  | Cortef Hydrocortisone                                             | Systemic Corticosteroid                | 2866      |
| Iloprost Tromethamine           | Iloprost, Ventavis Inhalation solution                            | Pulmonary Vasodilator                  | 26287     |
| Ipratropium bromide             | Atrovent, Atrovent HFA,                                           | Inhaled Bronchodilator                 | 57        |
| Levalbuterol (Nebulized or MDI) | Xopenex, Xopenex HFA, Xopenex Pediatric                           | Inhaled Bronchodilator                 | 19858     |
| Methylprednisolone              | Depo-medrol, Solu-medrol, Medrol                                  | Systemic Corticosteroid                | 2877      |
| Metolazone                      | Zaroxolyn                                                         | Diuretic                               | 3663      |
| Mometasone (MDI)                | Asmanex, Mometasone Furoate                                       | Inhaled Steroid                        | 3329      |
| Montelukast                     | Montelukast, Singulair                                            | Leukotriene receptor antagonist (LTRA) | 16911     |

**Table 1. Respiratory medications with standardized drug names and codes for DMS (continued)**

| Generic Name                    | Commonly used Brand Names                                                | Category                | Drug Code |
|---------------------------------|--------------------------------------------------------------------------|-------------------------|-----------|
| Prednisone / Prednisolone       | Prednisol, Flo-Pred, Millipred, Orapred, Orapred ODT, Pediapred, Prelone | Systemic Corticosteroid | 2879      |
| Racemic epinephrine (Nebulized) | Racepinephrine                                                           | Inhaled Bronchodilator  | 25002     |
| Sildenafil                      | Sildenafil Citrate, Viagra, Revatio                                      | Pulmonary Vasodilator   | 18084     |
| Spirolactone                    | Aldactone                                                                | Diuretic                | 2901      |
| Terbutaline                     | Terbutaline Sulfate                                                      | Bronchodilator          | 2071      |
| Theophylline                    | Quibron-T, Theo-Dur, Theo-24, uniphyll, Theochron, Theolair, TheoCap     | Methylxanthine          | 25        |
| Treprostinil                    | Remodulin (parenteral)                                                   | Pulmonary Vasodilator   | 2360      |
| Treprostinil                    | Tyvaso (inhaled)                                                         | Pulmonary Vasodilator   | 36541     |
| Triamcinolone (MDI)             | Azmacort                                                                 | Inhaled Steroid         | 2891      |

\*NOTE: Nasal formulations, topical ointments/creams and ophthalmologic drops or solutions should NOT be recorded in the database.

**Table 2. DMS entry for combination medications**

| Drug Name        | Standardized Drug Name | Drug Code |
|------------------|------------------------|-----------|
| Aldactazide      | Hydrochlorothiazide    | 3649      |
|                  | Spirolactone           | 2901      |
| Duoneb/Combivent | Albuterol              | 2073      |
|                  | Ipratropium            | 57        |
| Symbicort        | Budesonide             | 6545      |
|                  | Formoterol             | 10747     |
| Dulera           | Mometasone             | 3329      |
|                  | Formoterol             | 10747     |
| Advair           | Fluticasone            | 7873      |
|                  | Salmeterol             | 19963**   |

\*\*Note: Code 19963 is a code for Advair as Salmeterol and Fluticasone. If Advair was given, please record Fluticasone (Code 7873) and Salmeterol (Code 19963) as separate rows.
