# Supplementary material for: Prematurity and respiratory outcomes program (PROP): study protocol of a prospective multicenter study of respiratory outcomes of preterm infants in the United States
Source: PubMed Central journal article supplement (PMC4407843; doi:10.1186/s12887-015-0346-3), 2015-04-10
Supplement: 12887_2015_346_MOESM6_ESM.pdf [file 12887_2015_346_MOESM6_ESM.pdf]

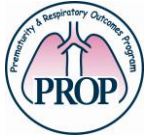

**PREMATURITY AND RESPIRATORY OUTCOMES PROGRAM**

**ADVERSE EVENT LOG**

PID: \_\_\_\_\_

DATE: \_\_\_ / \_\_\_ / \_\_\_\_\_

**Adverse Event Codelist**

| <b>Adverse Event Codes (AE)</b>                                                                                                                                                                                                                                                                                                                                                                                                                                                                                                                                                                           | <b>Outcome</b>                                                                                                                                           |
|-----------------------------------------------------------------------------------------------------------------------------------------------------------------------------------------------------------------------------------------------------------------------------------------------------------------------------------------------------------------------------------------------------------------------------------------------------------------------------------------------------------------------------------------------------------------------------------------------------------|----------------------------------------------------------------------------------------------------------------------------------------------------------|
| <p><b>1=</b> Administration of supplemental oxygen of <math>FiO_2 \geq 0.10</math> above baseline persisting for &gt; 1 hour after test is concluded or terminated</p> <p><b>2=</b> Tachycardia (defined as Heart Rate &gt; 200 beats per minute) persisting for &gt; 1 hour after test is concluded or terminated.</p> <p><b>3=</b> Apnea: Cessation of breathing &gt; 20 secs</p> <p><b>4=</b> Bradycardia: HR &lt; 80 bpm &gt; 10 secs</p> <p><b>5=</b> Any additional event possibly or probably related to study procedure.</p>                                                                      | <p><b>1 =</b> Recovered</p> <p><b>2 =</b> Recovered with Sequelae</p> <p><b>3 =</b> Not Recovered</p> <p><b>4 =</b> Fatal (Complete Record of Death)</p> |
| <p><b>Serious Adverse Event Codes (SAE)</b></p> <p><b>6=</b> Any need for CPR within 12 hours after the test is concluded or terminated.</p> <p><b>7=</b> Addition of mechanical ventilation within 12 hours after the test is concluded or terminated</p> <p><b>8=</b> Supplemental oxygen of <math>FiO_2 \geq 0.10</math> above baseline persisting for <math>\geq 12</math> hours after test is concluded or terminated</p> <p><b>9=</b> Any additional event deemed to be serious by the site Principal Investigator and possibly or probably related to study procedure.</p> <p><b>10=</b> Death</p> |                                                                                                                                                          |

Note: Apnea and bradycardia as defined here were reported in the initial study of RAC-type procedure for determination of BPD (Walsh 2003, 2004).

Also, persistent apnea despite stimulation or bradycardia (as defined above) are defined as reasons for failure of HCT, in addition to desaturation.

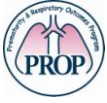

NOTE: Please indicate date of brain imaging exam in date field

1. Was brain imaging performed? <sub>0</sub> No <sub>1</sub> Yes
- 1a. If **Yes**, indicate at which time:
- <sub>1</sub> Within 7 days +/- 1 week after baby's birth  
<sub>2</sub> Within 30 days +/- 1 week after baby's birth  
<sub>3</sub> Between 34 Weeks and 40 Weeks Post-Menstrual Age
2. What imaging technique was used?
- <sub>1</sub> Head Ultra Sound (HUS)  
<sub>2</sub> Magnetic Resonance Imaging (MRI)
3. What were the results of the brain imaging, either the Worst HUS or MRI for this imaging? Check ALL that apply.
- Normal
  - Subependymal hemorrhage (Grade 1 hemorrhage)
  - IVH without ventricular dilation (Grade 2 hemorrhage)
  - IVH distending at least one lateral ventricle (Grade 3 hemorrhage)
  - Intraparenchymal echodense lesion (Grade 4 hemorrhage)
  - Cystic Periventricular Leucomalacia (PVL)
  - Porencephalic cyst
  - Ventriculomegaly (with or without resolving IVH)
  - Cortical atrophy
  - Cerebellar hemorrhage
  - Other, specify\*: \_\_\_\_\_

\* Do NOT report normal variants. Examples of normal variants include: Cavum septi pellucidum, connatal cysts, isolated choroid plexus cysts.

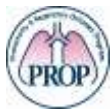

**PREMATURITY AND RESPIRATORY OUTCOMES PROGRAM**

PID: \_\_\_\_\_

**RECORD OF DEATH**

DATE: \_\_\_/\_\_\_/\_\_\_\_\_

1. What was the baby's date of death?

\_\_\_\_/\_\_\_\_/\_\_\_\_  
Month / Day / Year

2. What was the baby's primary cause of death?

(Specify cause of death from the death certificate\*)

\_\_\_\_\_

3. Was an autopsy performed?

<sub>0</sub> No

<sub>1</sub> Yes

<sub>88</sub> Unknown

3a. If **Yes**, what were the findings:

\_\_\_\_\_

\*If a death certificate is not available, please contact the primary care physician for a description of the events leading to death.

4. Please provide a short description of the infant's underlying condition prior to the events leading to the infant's death and the circumstances leading to the infant's death.

\_\_\_\_\_  
\_\_\_\_\_  
\_\_\_\_\_  
\_\_\_\_\_  
\_\_\_\_\_  
\_\_\_\_\_

5. Do you think that a cardiopulmonary disorder contributed to the death of this infant?

<sub>0</sub> No

<sub>1</sub> Yes

<sub>88</sub> Cannot make this determination

Signature of Principal Investigator: \_\_\_\_\_

Date of Signature: \_\_\_\_\_

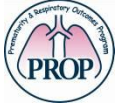

**PREMATURITY AND RESPIRATORY OUTCOMES PROGRAM**

PID: \_\_\_\_\_

**SPECIMEN COLLECTION FORM**

DATE: \_\_\_ / \_\_\_ / \_\_\_\_\_

1. Collection Date \_\_\_\_\_ / \_\_\_\_\_ / \_\_\_\_\_ [mm/dd/yyyy]

2. Collection Time (if applicable) \_\_\_\_\_ [24 hour clock]

3. Type of Specimen
- <sub>1</sub> Infant Tracheal Aspirate
  - <sub>2</sub> Infant Urine
  - <sub>3</sub> Infant Saliva for DNA
  - <sub>4</sub> Mother Saliva for DNA
  - <sub>5</sub> Father Saliva for DNA

4. Laboratory Accession Number (from TA or UR vial label)

|        |             |          |
|--------|-------------|----------|
|        |             |          |
| Site # | Sample Type | Sample # |

4a. Enter Tracheal Aspirate **CL** Lab Accession Number

|        |             |          |
|--------|-------------|----------|
|        |             |          |
| Site # | Sample Type | Sample # |

5. Number of Aliquots (for Tracheal Aspirate Supernatant or Urine) \_\_\_\_\_

5a. Date Tracheal Aspirate or Urine Specimen Frozen \_\_\_\_\_ / \_\_\_\_\_ / \_\_\_\_\_ [mm/dd/yyyy]

5b. Time Tracheal Aspirate or Urine Specimen Frozen: \_\_\_\_\_ [24 hour clock]

6. Date sample shipped to Core Lab: \_\_\_\_\_ / \_\_\_\_\_ / \_\_\_\_\_ [mm/dd/yyyy]

\*Sample Type

|    |                                                                        |
|----|------------------------------------------------------------------------|
| TA | Tracheal Aspirate Supernatant; send to UCSF Tracheal Aspirate Core Lab |
| CL | Tracheal Aspirate Cell Pellet; send to UCSF Tracheal Aspirate Core Lab |
| UR | Urine; send to Vanderbilt Urine Core Lab                               |
| DN | DNA (Saliva); send to Vanderbilt DNA Core Lab.                         |

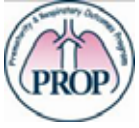

**PREMATURITY AND RESPIRATORY OUTCOMES PROGRAM**

PID: \_\_\_\_\_

**STUDY STATUS**

Date: \_\_\_ / \_\_\_ / \_\_\_\_\_

---

NOTE: This form must be completed when the infant's participation in the study ends early.

1. Date of last contact?

\_\_\_ / \_\_\_ / \_\_\_  
Month Day Year

2. Indicate the primary reason participation stopped:

<sub>1</sub> Unable to contact parents/caregivers

<sub>2</sub> Parents/Caregivers refuse further participation

<sub>98</sub> Other, specify \_\_\_\_\_

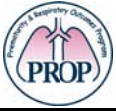

**PREMATURITY AND RESPIRATORY OUTCOMES PROGRAM**  
**RELOCATION CONTACT INFORMATION**  
ADMINISTRATIVE

PID: \_\_\_\_\_  
DATE: \_\_\_\_ / \_\_\_\_ / \_\_\_\_\_

**\*\*Please Note: This is an Administrative Form. All personal information provided will be held in confidence and will not be entered into the Data Management System Database.\*\***

1. Child's Name: First \_\_\_\_\_ Last \_\_\_\_\_
2. Mother's Full Name First \_\_\_\_\_ Last \_\_\_\_\_
3. Father's Full Name First \_\_\_\_\_ Last \_\_\_\_\_
4. Infant Date of Birth \_\_\_\_\_ / \_\_\_\_\_ / \_\_\_\_\_  
Month Day Year
5. Date of relocation: \_\_\_\_\_ / \_\_\_\_\_ / \_\_\_\_\_  
Month Day Year
6. New Clinical Center \_\_\_\_\_  
 PROP Site OR  Non-PROP Site
7. New Address: \_\_\_\_\_  
\_\_\_\_\_  
\_\_\_\_\_
8. New Telephone Number: \_\_\_\_\_ - \_\_\_\_\_ - \_\_\_\_\_

**New Family Physician/ Pediatrician:**

9. Name: Dr \_\_\_\_\_
10. Address: \_\_\_\_\_  
\_\_\_\_\_  
\_\_\_\_\_
11. Phone: \_\_\_\_\_ - \_\_\_\_\_ - \_\_\_\_\_
12. Confirm the following:
- Parents have agreed to have the child seen at the new PROP Site
  - Parents have consented to release child's medical records
  - Child's medical records have been sent to the new PROP Site

\_\_\_\_\_  
Signature from original PROP Site

\_\_\_\_\_  
Date
