# Supplementary material for: Prematurity and respiratory outcomes program (PROP): study protocol of a prospective multicenter study of respiratory outcomes of preterm infants in the United States
Source: PubMed Central journal article supplement (PMC4407843; doi:10.1186/s12887-015-0346-3), 2015-04-10
Supplement: 12887_2015_346_MOESM7_ESM.pdf [file 12887_2015_346_MOESM7_ESM.pdf]

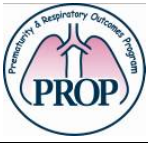

PREMATURITY AND RESPIRATORY OUTCOMES PROGRAM

PID: \_\_\_\_\_

NONINVASIVE RESPIRATORY ASSESSMENTS [NIRA]

DATE: \_\_\_ / \_\_\_ / \_\_\_\_\_

NOTE: Please indicate date of assessment in date field.

BASELINE DATA

- 1. Were RIP bands placed on the baby?  No  Yes
  - 1a. If 'No', please check primary reason infant missed test
    - 1 Baby was ineligible
    - 2 Baby was eligible but discharged
    - 3 Staff oversight/Staff not available to perform test
    - 98 Other, specify: \_\_\_\_\_

2. Date PO feeds started \_\_\_\_\_ / \_\_\_\_\_ / \_\_\_\_\_  
mm / dd / yyyy

3. What was the baby's most recent body weight? \_\_\_\_\_ gms

4. Baseline Heart Rate \_\_\_\_\_ Beats per minute

5. Respiratory Status:  1 No Respiratory Support  2 Nasal cannula ≤ 1 LPM

5a. If 'Nasal cannula' is checked, provide oxygen flow: \_\_\_\_\_ LPM \_\_\_\_\_ %

6. Nasogastric Tube (NGT) placement at the start of the test  1 In  2 Out

OXYGENATION WHILE FEEDING [OWF]

- 7. Was the Oxygenation While Feeding [OWF] test performed?  No  Yes
  - 7a. If 'No', please check primary reason infant missed test
    - 1 Baby was ineligible
    - 2 Baby was eligible but discharged
    - 3 Staff oversight/Staff not available to perform test
    - 4 Site does not perform OWF
    - 98 Other, specify: \_\_\_\_\_

Please Note: If your site does not perform OWF, skip to question #11.

8. Caloric density: \_\_\_\_\_ cal/oz

9. Start volume in bottle: \_\_\_\_\_ mL

10. End volume in bottle: \_\_\_\_\_ mL

| Event Codes                       |                                     |                            |
|-----------------------------------|-------------------------------------|----------------------------|
| P= Feeding Position               | B= Begin Feeding                    | I= Interruption of feeding |
| R= Resumed Feeding                | E= End of Feeding or Bronchodilator | D= Disconnect              |
| Q= Infant is in quiet sleep state | A= Infant is awake or active sleep  |                            |



**RESPIRATORY INDUCTIVE PLETHYSMOGRAPHY [RIP] and OXYGENATION WHILE SLEEPING [OWS]**

11. Was the baby's last feed >30 minutes ago? <sub>0</sub> No <sub>1</sub> Yes
12. Was the baby in quiet sleep state at the start of the test? <sub>0</sub> No <sub>1</sub> Yes
13. Was the Respiratory Inductive Plethysmography [RIP] test performed? <sub>0</sub> No <sub>1</sub> Yes
- 13a. If 'No', please check primary reason infant missed test
- <sub>1</sub> Baby was ineligible
  - <sub>2</sub> Baby was eligible but discharged
  - <sub>3</sub> Staff oversight/Staff not available to perform test
  - <sub>4</sub> Baby not in quiet sleep
  - <sub>98</sub> Other, specify: \_\_\_\_\_

14. Was the Oxygenation While Sleeping [OWS] test performed? <sub>0</sub> No <sub>1</sub> Yes
- 14a. If 'No', please check primary reason infant missed test
- <sub>1</sub> Baby was ineligible
  - <sub>2</sub> Baby was eligible but discharged
  - <sub>3</sub> Staff oversight/Staff not available to perform test
  - <sub>4</sub> Baby not in quiet sleep
  - <sub>98</sub> Other, specify: \_\_\_\_\_

**BRONCHODILATOR [BD] ADMINISTRATION**

15. Was bronchodilator administered to the baby? <sub>0</sub> No <sub>1</sub> Yes
- 15a. If 'Not Done', please check primary reason infant missed test
- <sub>1</sub> Baby was ineligible
  - <sub>2</sub> Baby was eligible but discharged
  - <sub>3</sub> Staff oversight/Staff not available to perform test
  - <sub>98</sub> Other, specify: \_\_\_\_\_

16. Was entire bronchodilator dose given? <sub>0</sub> No <sub>1</sub> Yes
17. Treatment Response Heart Rate \_\_\_\_\_ BPM

**POST- BRONCHODILATOR RIP DATA**

18. Was bronchodilator administration terminated early? <sub>0</sub> No <sub>1</sub> Yes
- 18a. If 'Yes', check primary reason for early termination:
- <sub>1</sub> Infant woke up
  - <sub>2</sub> Hypoxemia
  - <sub>3</sub> Respiratory Distress
  - <sub>4</sub> Heart Rate exceeded 10% above baseline
  - <sub>98</sub> Other, please specify \_\_\_\_\_

18b. Total time of bronchodilator treatment. \_\_\_\_\_ minutes

Please Note: If any Adverse Events occurred during the assessments, please record the details in the Adverse Event Log (AE).

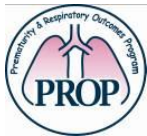

NOTE: Please indicate date of assessment in date field

**BASELINE DATA**

- 1. Indicate baby's post-menstrual age at time of assessment      \_\_\_ Weeks      \_\_\_ Day
- 2. What is the baby's body weight?      \_\_\_\_\_ gms
- 3. Baseline Respiratory Rate (RR)      \_\_\_\_\_ Breaths per minute
- 4. Baseline Heart Rate      \_\_\_\_\_ Beats per minute
- 5. Respiratory Status
  - <sub>1</sub> No Continuous Respiratory Support [No BPD]
  - <sub>2</sub> Nasal Cannula [Continue to question 5a]
  - <sub>3</sub> CPAP, SiPAP or MV [BPD]
- 5a. Oxygen flow (nasal cannula only):      \_\_\_ LPM      \_\_\_ %
- 6. SpO<sub>2</sub>:      \_\_\_\_\_ %
- 7. Most recent PCO<sub>2</sub>      \_\_\_\_\_ <sub>99</sub> NA
- 7a. Date of PCO<sub>2</sub>      \_\_\_/\_\_\_/\_\_\_\_\_  
mm/dd/yyyy

**ROOM AIR CHALLENGE [RAC]/ OXYGEN and FLOW REDUCTION to ROOM AIR**

- 8. Was the Room Air Challenge test performed?      <sub>0</sub> No      <sub>1</sub> Yes
  - 8a. If 'No' please check primary reason infant missed test
    - <sub>1</sub> Baby was ineligible [Complete item 8b.]
    - <sub>2</sub> Baby was eligible but discharged or transferred
    - <sub>3</sub> Staff oversight/Staff or equipment not available to perform test
    - <sub>98</sub> Other, specify: \_\_\_\_\_
  - 8b. If ineligible, please check primary reason for ineligibility
    - <sub>1</sub> Baby was off all continuous support
    - <sub>2</sub> Baby was on higher level of support than nasal cannula
    - <sub>3</sub> Unable to maintain baseline saturation SpO<sub>2</sub> ≥90%
    - <sub>4</sub> 40 weeks only: No BPD at 36 weeks (Off continuous support or passed RAC)
- 9. Did Infant arouse (active sleep or awake) during the observation period?      <sub>0</sub> No      <sub>1</sub> Yes



**PREMATURITY AND RESPIRATORY OUTCOMES PROGRAM**

PID: \_\_\_\_\_

**ROOM AIR CHALLENGE**

DATE: \_\_\_ / \_\_\_ / \_\_\_\_\_

10. Please indicate the result of the Room Air Challenge test:

- <sub>1</sub> Pass [No PBD]  
<sub>2</sub> Fail [BPD] Complete items 10a-c

10a. Record time to fail test:

\_\_\_\_\_ minutes

10b. Please indicate primary reason for test failure:

- <sub>2</sub> Desaturation <90% for 5 consecutive minutes  
<sub>3</sub> Desaturation <80% for 15 consecutive seconds  
<sub>4</sub> Apnea  
<sub>5</sub> Bradycardia  
<sub>98</sub> Other, specify: \_\_\_\_\_

10c. Respiratory Support at Failure:

\_\_\_\_.\_\_\_\_ LPM    \_\_\_\_\_. \_\_\_\_%

11. Final Respiratory Rate

\_\_\_\_\_ Breaths/minute

12. Final Heart Rate

\_\_\_\_\_ Beats/minute

13. Final SpO<sub>2</sub>

\_\_\_\_\_%

**Note:** If any Adverse Events occurred during the assessment, record the details in the Adverse Event Log (AE).

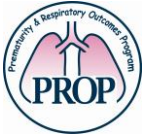

**PREMATURITY AND RESPIRATORY OUTCOMES PROGRAM**  
**ROOM AIR CHALLENGE WORKSHEET**

PID: \_\_\_\_\_

DATE: \_\_\_ / \_\_\_ / \_\_\_\_\_

Complete this form for all infants on whom you initiate a Room Air Challenge test.

**Instructions: Notify physician responsible for the infant’s care (attending or fellow), and obtain MD order to perform room air challenge.**

- Challenge should be done with a pulse oximeter that has been getting a good signal for at least 5 minutes.
- Position infant supine, with any feedings or medications given 30 minutes prior to evaluation.
- Infant in Quiet Sleep (QS) at study initiation (Criteria: 1) Eyes closed and without movement, 2) Steady breathing, 3) Not vocalizing, and 4) No twitching of limbs (startles acceptable))
- Baseline data collection is done in infant’s current oxygen
- Record oxygen saturation every 1 minute x 5 minutes
- Assess if infant is in Quiet Sleep (QS) every 5 minutes

**Baseline Measurements**

Heart Rate: \_\_\_\_\_ (bpm)

RR: \_\_\_\_\_ (breaths per minute. Count for a full minute.)

|               |                                            |       |       |       |       |       |
|---------------|--------------------------------------------|-------|-------|-------|-------|-------|
| Baseline Data | FiO <sub>2</sub> : _____ Liter flow: _____ |       |       |       |       |       |
|               | 0 min                                      | 1 min | 2 min | 3 min | 4 min | 5 min |
| Time          | :                                          | :     | :     | :     | :     | :     |
| Saturation    |                                            |       |       |       |       |       |
| QS (Y/N)      |                                            |       |       |       |       |       |

**Continue to oxygen reduction phase if all saturations are ≥ 90%**

If unable to maintain saturations ≥ 90% continue to monitor for additional 10 minutes

|            |       |       |       |       |        |        |        |        |        |        |
|------------|-------|-------|-------|-------|--------|--------|--------|--------|--------|--------|
|            | 6 min | 7 min | 8 min | 9 min | 10 min | 11 min | 12 min | 13 min | 14 min | 15 min |
| Time       | :     | :     | :     | :     | :      | :      | :      | :      | :      | :      |
| Saturation |       |       |       |       |        |        |        |        |        |        |
| QS (Y/N)   |       |       |       |       |        |        |        |        |        |        |

If infant fails to proceed to Oxygen and Flow reduction phase, record Infant as **Ineligible** and indicate reason for failure:

**“Unable to maintain baseline SpO<sub>2</sub> ≥ 90%”**



# PREMATURITY AND RESPIRATORY OUTCOMES PROGRAM

## ROOM AIR CHALLENGE WORKSHEET

PID: \_\_\_\_\_

DATE: \_\_\_ / \_\_\_ / \_\_\_\_\_

### Oxygen and Flow Reduction Phase:

1. Step \_\_\_\_\_ FiO<sub>2</sub> \_\_\_\_\_ Liter flow \_\_\_\_\_

|            | Minutes |   |   |   |   |   |   |   |   |    |
|------------|---------|---|---|---|---|---|---|---|---|----|
|            | 1       | 2 | 3 | 4 | 5 | 6 | 7 | 8 | 9 | 10 |
| Time       | :       | : | : | : | : | : | : | : | : | :  |
| Saturation |         |   |   |   |   |   |   |   |   |    |
| QS (Y/N)   |         |   |   |   |   |   |   |   |   |    |

2. Step \_\_\_\_\_ FiO<sub>2</sub> \_\_\_\_\_ Liter flow \_\_\_\_\_

|            | Minutes |   |   |   |   |   |   |   |   |    |
|------------|---------|---|---|---|---|---|---|---|---|----|
|            | 1       | 2 | 3 | 4 | 5 | 6 | 7 | 8 | 9 | 10 |
| Time       | :       | : | : | : | : | : | : | : | : | :  |
| Saturation |         |   |   |   |   |   |   |   |   |    |
| QS (Y/N)   |         |   |   |   |   |   |   |   |   |    |

3. Step \_\_\_\_\_ FiO<sub>2</sub> \_\_\_\_\_ Liter flow \_\_\_\_\_

|            | Minutes |   |   |   |   |   |   |   |   |    |
|------------|---------|---|---|---|---|---|---|---|---|----|
|            | 1       | 2 | 3 | 4 | 5 | 6 | 7 | 8 | 9 | 10 |
| Time       | :       | : | : | : | : | : | : | : | : | :  |
| Saturation |         |   |   |   |   |   |   |   |   |    |
| QS (Y/N)   |         |   |   |   |   |   |   |   |   |    |

**Continue wean if all saturations are ≥ 90%. Stop Wean and record as FAIL if:**

Saturation <90% for 5 consecutive minutes

OR

Saturation <80% for 15 seconds

**Record time to fail test**

**Record any adverse event (AE) with time of event:**

Apnea > 20 seconds

Bradycardia HR < 80 for > 10 seconds

**Wean instructions:**

**If the infant is receiving supplemental oxygen by cannula:**

- A) Wean FiO<sub>2</sub> by 0.20 every 5 minutes until FiO<sub>2</sub> 0.21
- B) Record saturation every minute

**Then wean the flow:**

- A) If the flow is ≥ 1.5 LPM, reduce flow by 1LPM. Monitor infant on reduced flow for 10 minutes.
- B) Record saturation every minute
- C) Once flow is < 1.5LPM reduce flow by 50%. Monitor infant on reduced flow for 10 minutes.
- D) Record saturation every minute.
- E) Gently remove nasal cannula from nares

**After the nasal cannula has been removed, record saturations every 5 minutes until 60 minutes have elapsed**



# PREMATURITY AND RESPIRATORY OUTCOMES PROGRAM

## ROOM AIR CHALLENGE WORKSHEET

PID: \_\_\_\_\_

DATE: \_\_\_ / \_\_\_ / \_\_\_\_\_

4. Step \_\_\_\_\_ FiO<sub>2</sub> \_\_\_\_\_ Liter flow \_\_\_\_\_

|            | Minutes |   |   |   |   |   |   |   |   |    |
|------------|---------|---|---|---|---|---|---|---|---|----|
|            | 1       | 2 | 3 | 4 | 5 | 6 | 7 | 8 | 9 | 10 |
| Time       | :       | : | : | : | : | : | : | : | : | :  |
| Saturation |         |   |   |   |   |   |   |   |   |    |
| QS (Y/N)   |         |   |   |   |   |   |   |   |   |    |

5. Step \_\_\_\_\_ FiO<sub>2</sub> \_\_\_\_\_ Liter flow \_\_\_\_\_

|            | Minutes |   |   |   |   |   |   |   |   |    |
|------------|---------|---|---|---|---|---|---|---|---|----|
|            | 1       | 2 | 3 | 4 | 5 | 6 | 7 | 8 | 9 | 10 |
| Time       | :       | : | : | : | : | : | : | : | : | :  |
| Saturation |         |   |   |   |   |   |   |   |   |    |
| QS (Y/N)   |         |   |   |   |   |   |   |   |   |    |

6. Step \_\_\_\_\_ FiO<sub>2</sub> \_\_\_\_\_ Liter flow \_\_\_\_\_

|            | Minutes |   |   |   |   |   |   |   |   |    |
|------------|---------|---|---|---|---|---|---|---|---|----|
|            | 1       | 2 | 3 | 4 | 5 | 6 | 7 | 8 | 9 | 10 |
| Time       | :       | : | : | : | : | : | : | : | : | :  |
| Saturation |         |   |   |   |   |   |   |   |   |    |
| QS (Y/N)   |         |   |   |   |   |   |   |   |   |    |

7. Step \_\_\_\_\_ FiO<sub>2</sub> \_\_\_\_\_ Liter flow \_\_\_\_\_

|            | Minutes |   |   |   |   |   |   |   |   |    |
|------------|---------|---|---|---|---|---|---|---|---|----|
|            | 1       | 2 | 3 | 4 | 5 | 6 | 7 | 8 | 9 | 10 |
| Time       | :       | : | : | : | : | : | : | : | : | :  |
| Saturation |         |   |   |   |   |   |   |   |   |    |
| QS (Y/N)   |         |   |   |   |   |   |   |   |   |    |

**Continue wean if all saturations are ≥ 90%. Stop Wean and record as**

**FAIL if:**

Saturation <90% for 5 consecutive minutes

OR

Saturation <80% for 15 seconds

**Record time to fail test**

**Record any adverse event (AE) with time of event:**

Apnea >20 seconds

Bradycardia HR < 80 for > 10 seconds

**Wean instructions:**

**If the infant is receiving supplemental oxygen by cannula:**

C) Wean FiO<sub>2</sub> by 0.20 every 5 minutes until FiO<sub>2</sub> 0.21

D) Record saturation every minute

**Then wean the flow:**

F) If the flow is ≥ 1.5 LPM, reduce flow by 1LPM. Monitor infant on reduced flow for 10 minutes.

G) Record saturation every minute

H) Once flow is < 1.5LPM reduce flow by 50%. Monitor infant on reduced flow for 10 minutes.

I) Record saturation every minute.

J) Gently remove nasal cannula from nares

**After the nasal cannula has been removed, record saturations every 5 minutes until 60 minutes have elapsed**



# PREMATURITY AND RESPIRATORY OUTCOMES PROGRAM

## ROOM AIR CHALLENGE WORKSHEET

PID: \_\_\_\_\_

DATE: \_\_\_ / \_\_\_ / \_\_\_\_\_

8. Step \_\_\_\_\_ FiO<sub>2</sub> \_\_\_\_\_ Liter flow \_\_\_\_\_

|            | Minutes |   |   |   |   |   |   |   |   |    |
|------------|---------|---|---|---|---|---|---|---|---|----|
|            | 1       | 2 | 3 | 4 | 5 | 6 | 7 | 8 | 9 | 10 |
| Time       | :       | : | : | : | : | : | : | : | : | :  |
| Saturation |         |   |   |   |   |   |   |   |   |    |
| QS (Y/N)   |         |   |   |   |   |   |   |   |   |    |

### Begin Room Air Observation

**PASS: All saturations ≥ 90% for 1 hour**  
**FAIL: Saturation < 90% for 5 consecutive minutes**

**OR**

**Saturation < 80% for 15 consecutive seconds**

**Record saturation every 5 minutes until 60 minutes have elapsed**  
**Return infant to previous level of supplemental oxygen and flow**

**Results of Room Air Challenge**  
 Pass      Fail (note reason for failure)

**Notify clinical care team of test results**

|               | Minutes |        |        |        |        |        |
|---------------|---------|--------|--------|--------|--------|--------|
|               | 5 min   | 10 min | 15 min | 20 min | 25 min | 30 min |
| 1. Time       | :       | :      | :      | :      | :      | :      |
| 2. Saturation |         |        |        |        |        |        |
| 3. QS (Y/N)   |         |        |        |        |        |        |

|  | Minutes |        |        |        |        |        |
|--|---------|--------|--------|--------|--------|--------|
|  | 35 min  | 40 min | 45 min | 50 min | 55 min | 60 min |
|  |         |        |        |        |        |        |





**PREMATURITY AND RESPIRATORY OUTCOMES PROGRAM**  
**ROOM AIR CHALLENGE WORKSHEET**

PID: \_\_\_\_\_

DATE: \_\_\_ / \_\_\_ / \_\_\_\_\_

|               |   |   |   |   |   |   |
|---------------|---|---|---|---|---|---|
| 1. Time       | : | : | : | : | : | : |
| 2. Saturation |   |   |   |   |   |   |
| 3. QS (Y/N)   |   |   |   |   |   |   |

**At conclusion of test:**

Heart Rate: \_\_\_ \_\_\_ \_\_\_ (bpm)

RR: \_\_\_ \_\_\_ (breaths per minute. Count for a full minute.)

If FAIL, time to failure from initiation of oxygen/flow wean: \_\_\_ \_\_\_ \_\_\_ (in minutes)

If any AE occur, please complete AE Log. Record details below, as available.

**AE (from time of initiation of wean through completion of Room Air Observation phase):**

1. Apnea (cessation of breathing > 20 secs). Time \_\_\_ \_\_\_ : \_\_\_ \_\_\_
2. Bradycardia (HR < 80 bpm > 10 secs). Time \_\_\_ \_\_\_ : \_\_\_ \_\_\_

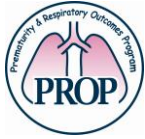

**PREMATURITY AND RESPIRATORY OUTCOMES PROGRAM**

**HYPOXIC CHALLENGE TEST**

PID: \_\_\_\_\_

DATE: \_\_\_\_ / \_\_\_\_ / \_\_\_\_

NOTE: Please indicate date of assessment in date field

**BASELINE DATA**

- 1. Indicate baby's post-menstrual age at time of assessment      \_\_\_ Weeks      \_\_\_ Day
- 2. What is the baby's body weight?      \_\_\_ \_\_\_ gms
- 3. Baseline Respiratory Rate (RR)      \_\_\_ \_\_\_ Breaths per minute
- 4. Baseline Heart Rate      \_\_\_ \_\_\_ Beats per minute
- 5. SpO<sub>2</sub>      \_\_\_ . \_\_\_ %

**HYPOXIC CHALLENGE TEST [HCT]/ OXYGEN REDUCTION to 15%**

- 6. Was the Hypoxic Challenge test performed?      <sub>0</sub> No      <sub>1</sub> Yes
  - 6a. If 'No' please check primary reason infant missed test
    - <sub>1</sub> Baby was ineligible [Complete item 6b.]
    - <sub>2</sub> Baby was eligible but discharged or transferred
    - <sub>3</sub> Staff oversight/Staff or equipment not available to perform test
    - <sub>4</sub> Baby had acute respiratory illness
    - <sub>98</sub> Other, specify: \_\_\_\_\_
  - 6b. If ineligible, please check primary reason for ineligibility
    - <sub>1</sub> Failed RAC
    - <sub>2</sub> Not weaned off clinical respiratory support
    - <sub>3</sub> Unable to maintain baseline saturation SpO<sub>2</sub> ≥90%
    - <sub>4</sub> On continuous respiratory support without RAC at 36 weeks PMA
- 7. Did Infant arouse (active sleep or awake) during the observation period?      <sub>0</sub> No      <sub>1</sub> Yes
- 8. Please indicate the result of the Hypoxic Challenge test:
  - <sub>1</sub> Pass
  - <sub>2</sub> Fail [Complete items 8a-b]
- 8a. Record time to fail test:      \_\_\_\_\_ minutes
- 8b. Please indicate primary reason for test failure:
  - <sub>2</sub> Desaturation <85% for 60 consecutive seconds
  - <sub>3</sub> Desaturation <80% for 15 consecutive seconds
  - <sub>4</sub> Apnea
  - <sub>5</sub> Bradycardia
  - <sub>98</sub> Other, specify: \_\_\_\_\_
- 9. Final Respiratory Rate      \_\_\_\_\_ Breaths/minute
- 10. Final Heart Rate      \_\_\_\_\_ Beats/minute
- 11. Final SpO<sub>2</sub>      \_\_\_ . \_\_\_ %

**Note:** If any Adverse Events occurred during the assessment, record the details in the Adverse Event Log (AE).



# PREMATURITY AND RESPIRATORY OUTCOMES PROGRAM

## HYPoxic CHALLENGE TEST WORKSHEET

PID: \_\_\_\_\_

DATE: \_\_\_ / \_\_\_ / \_\_\_\_\_

Complete this form for all infants on whom you initiate a Hypoxic Challenge Test.

**Instructions: Notify physician responsible for the infant's care (attending or fellow), and obtain MD order to perform Hypoxic Challenge Test.**

- Challenge should be done with a pulse oximeter that has been getting a good signal for at least 5 minutes.
- Position infant supine, with any feedings or medications given 30 minutes prior to evaluation.
- Infant in Quiet Sleep (QS) at study initiation (Criteria: 1) Eyes closed and without movement, 2) Steady breathing, 3) Not vocalizing, and 4) No twitching of limbs (startles acceptable))
- Baseline data collection is done with the infant on room air
- Record oxygen saturation every 1 minute x 20 minutes
- Assess if infant is in Quiet Sleep (QS) every 5 minutes

### Baseline Measurements

Heart Rate: \_\_\_\_\_ (bpm)

RR: \_\_\_\_\_ (breaths per minute. Count for a full minute.)

| Baseline Data | 0 min | 1 min | 2 min | 3 min | 4 min | 5 min |
|---------------|-------|-------|-------|-------|-------|-------|
|               | Time  | :     | :     | :     | :     | :     |
| Saturation    |       |       |       |       |       |       |
| QS (Y/N)      |       |       |       |       |       |       |

|            | 6 min | 7 min | 8 min | 9 min | 10 min | 11 min | 12 min | 13 min | 14 min | 15 min |
|------------|-------|-------|-------|-------|--------|--------|--------|--------|--------|--------|
| Time       | :     | :     | :     | :     | :      | :      | :      | :      | :      | :      |
| Saturation |       |       |       |       |        |        |        |        |        |        |
| QS (Y/N)   |       |       |       |       |        |        |        |        |        |        |

Continue to the oxygen reduction phase if after 15 minutes all saturations recorded are  $\geq 90\%$ . If oxygen saturations are not maintained  $\geq 90\%$ , record infant as **Ineligible** for the Hypoxic Challenge and indicate reason for failure: **“Unable to maintain baseline SpO<sub>2</sub>  $\geq 90\%$ ”**



# PREMATURITY AND RESPIRATORY OUTCOMES PROGRAM

## HYPOXIC CHALLENGE TEST WORKSHEET

PID: \_\_\_\_\_

DATE: \_\_\_ / \_\_\_ / \_\_\_\_\_

### Oxygen Reduction Phase

- Place infant in high flow oxygen hood with oxygen sensor reading 15±1%
- Ensure oxygen analyzer reading has stabilized prior to initiation of data collection
- Record FiO<sub>2</sub>, Time, Saturation every minute for maximum of 20 minutes
- If infant has apnea during test, provide stimulation as per routine care.
- For persistent apnea or bradycardia turn off nitrogen, remove hood, may treat with supplemental oxygen if needed.
- At conclusion of test, turn off nitrogen gas and remove oxyhood.
- Record Heart Rate and Respiratory Rate
- Observe to assure saturation level return to baseline or > 85% on room air
- Supplemental oxygen may be used for persistent desaturation, until infant recovers to saturation > 85%

|                  | Minutes |   |   |   |   |   |   |   |   |    |
|------------------|---------|---|---|---|---|---|---|---|---|----|
|                  | 1       | 2 | 3 | 4 | 5 | 6 | 7 | 8 | 9 | 10 |
| FiO <sub>2</sub> |         |   |   |   |   |   |   |   |   |    |
| Time             | :       | : | : | : | : | : | : | : | : | :  |
| Saturation       |         |   |   |   |   |   |   |   |   |    |
| QS (Y/N)         |         |   |   |   |   |   |   |   |   |    |

|                  | Minutes |    |    |    |    |    |    |    |    |    |
|------------------|---------|----|----|----|----|----|----|----|----|----|
|                  | 11      | 12 | 13 | 14 | 15 | 16 | 17 | 18 | 19 | 20 |
| FiO <sub>2</sub> |         |    |    |    |    |    |    |    |    |    |
| Time             | :       | :  | :  | :  | :  | :  | :  | :  | :  | :  |
| Saturation       |         |    |    |    |    |    |    |    |    |    |
| QS (Y/N)         |         |    |    |    |    |    |    |    |    |    |

**Record as PASS if saturations are ≥ 85 % for 20 minutes**

**Stop challenge and record as FAIL if:**

Saturation <85% for 60 consecutive seconds

OR

Saturation < 80% for 15 consecutive seconds

OR

Any need to prematurely terminate the test  
(bradycardia or persistent apnea)

**Record time to fail test (in minutes)**

**Record any adverse event (AE) with time of event:**

Apnea >20 seconds

Bradycardia HR <80 for >10 seconds

**Additional AE/SAE following termination of exposure to  
FiO<sub>2</sub> 0.15, below**



# PREMATURITY AND RESPIRATORY OUTCOMES PROGRAM

## HYPOXIC CHALLENGE TEST WORKSHEET

PID: \_\_\_\_\_

DATE: \_\_\_ / \_\_\_ / \_\_\_\_\_

### Results of Hypoxic Challenge Test

**Pass** or **Fail** (note reason for failure)

#### **Desaturation**

**Persistent apnea > 20 secs**

**Bradycardia < 80 bpm x 10 secs**

**Notify clinical care team of the test results**

### **At conclusion of test:**

Heart Rate: \_\_\_\_\_ (bpm)

RR: \_\_\_\_\_ (breaths per minute. Count for a full minute.)

If FAIL, time to failure from initiation of exposure to  $\text{FiO}_2$  0.15: \_\_\_\_\_ (in minutes)

If any AE or SAE occur, please complete AE/SAE Log. Record details below, as available.

### **AE (from time of initiation of $\text{FiO}_2$ 0.15):**

1. Apnea (cessation of breathing > 20 secs). Time \_\_\_\_\_ : \_\_\_\_\_
2. Bradycardia (HR < 80 bpm > 10 secs). Time \_\_\_\_\_ : \_\_\_\_\_

### **AE (following completion of test):**

1. Supplemental oxygen of  $\text{FiO}_2 \geq 0.10$  above baseline persisting for > 1 hour after test is concluded or terminated.
2. Tachycardia (> 200 bpm) persisting for > 1 hour after test is concluded or terminated.



## PREMATURITY AND RESPIRATORY OUTCOMES PROGRAM

### HYPOXIC CHALLENGE TEST WORKSHEET

PID: \_\_\_\_\_

DATE: \_\_\_ / \_\_\_ / \_\_\_\_\_

#### SAE (to be reported if possibly or probably related to study procedures):

1. Any need for CPR within 12 hours after test is concluded or terminated (*i.e.*, chest compressions or cardiac medications given for resuscitation). Date \_\_\_ / \_\_\_ / \_\_\_ Time \_\_\_ : \_\_\_
2. The addition of mechanical ventilation within 12 hours after the test is concluded or terminated.  
Date \_\_\_ / \_\_\_ / \_\_\_ Time \_\_\_ : \_\_\_
3. Supplemental oxygen of  $FiO_2 \geq 0.10$  above baseline persisting for  $\geq 12$  hours after test is concluded or terminated.  
Date \_\_\_ / \_\_\_ / \_\_\_ Time \_\_\_ : \_\_\_
4. Any additional event deemed to be serious by the site Principal Investigator and possibly or probably related to study procedure. Date \_\_\_ / \_\_\_ / \_\_\_ Time \_\_\_ : \_\_\_
